# Supplementary material for: Synergetic spin singlet–quintet switching and luminescence in mononuclear Fe(ii) 1,3,4-oxadiazole tetradentate chelates with NCBH3 co-ligand
Source: Royal Society of Chemistry journal article supplement (doi:10.1039/d3dt02420b), 2023-01-01
Supplement: d3dt02420b1.pdf [file d3dt02420b1.pdf]

# Synergetic Spin Singlet-Quintet Switching and Luminescence in mononuclear Fe(II) 1,3,4-Oxadiazole Tetradentate Chelates with NCBH<sub>3</sub> Co-ligand.

Sriram Sundaresan,<sup>a</sup> Jens-Georg Becker,<sup>a</sup> Julian Eppelsheimer,<sup>a</sup> Alexander Sedykh,<sup>b</sup> Luca. M. Carrella,<sup>a</sup> Müller-Buschbaum<sup>b</sup> and Eva Rentschler<sup>a\*</sup>

<sup>a</sup>Department Chemie, Johannes-Gutenberg-Universität Mainz, Duesbergweg 10–14, 55128 Mainz, Germany. Email: rentschl@uni-mainz.de

<sup>b</sup>Institute of Inorganic and Analytical Chemistry, Justus-Liebig-University Giessen, Heinrich-Buff-Ring 17, 35392, Giessen, Germany.

## Electronic Supplementary Information

### Table of Contents

|                                          |    |
|------------------------------------------|----|
| 1. NMR-spectra: .....                    | 2  |
| 2. IR-spectra: .....                     | 10 |
| 3. Mass spectra: .....                   | 12 |
| 4. Crystal structures: .....             | 14 |
| 5. UV-Vis-Spectra: .....                 | 18 |
| 6. Photoluminescence spectroscopy .....  | 20 |
| 6. Magnetic Data: .....                  | 22 |
| 7. Synthesis of complex precursors ..... | 25 |
| 8. References: .....                     | 25 |

# 1. NMR-spectra:

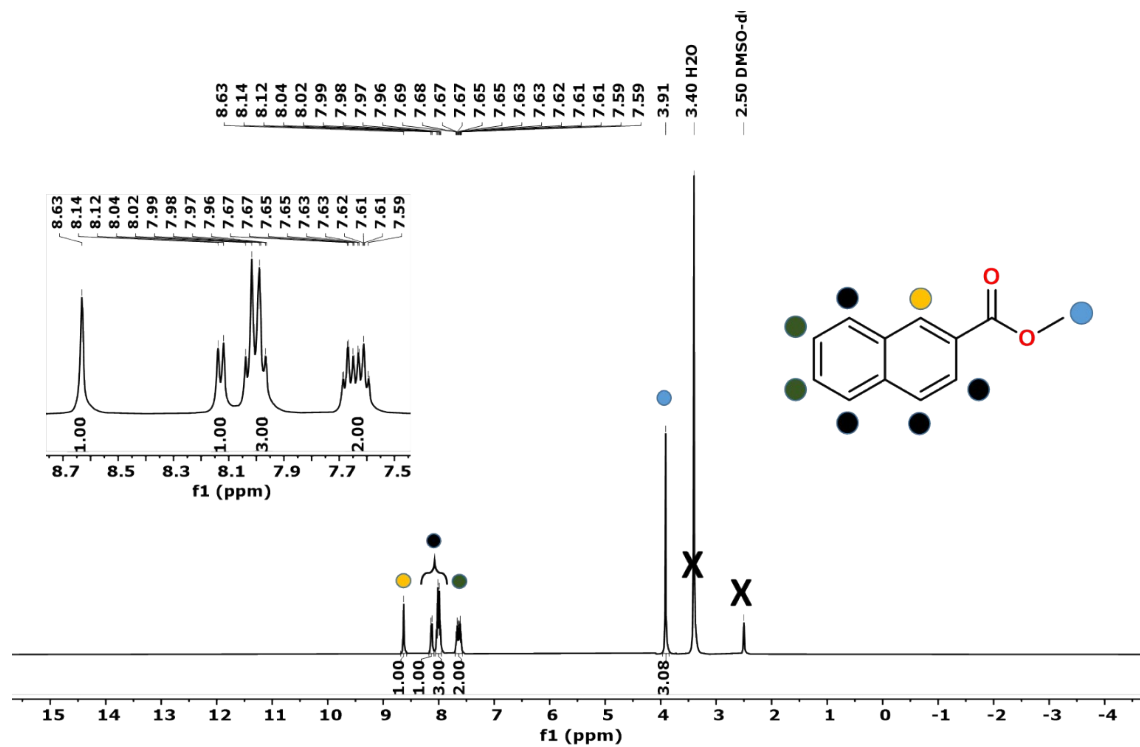

Figure S1:  $^1\text{H-NMR}$ -spectra of Methyl-2-naphthoate (I) in  $\text{D}^6\text{-DMSO}$ .

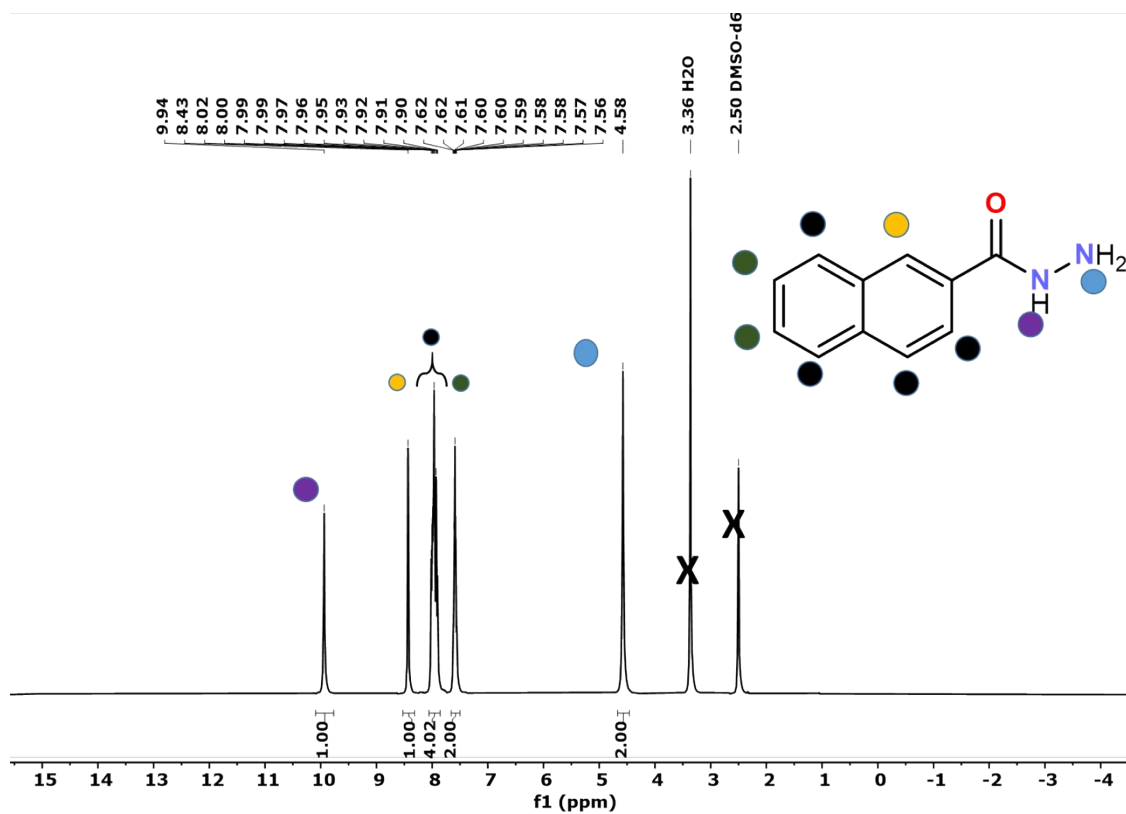

Figure S2:  $^1\text{H}$ -NMR-spectra of 2-Naphthohydrazide (II) in  $\text{D}^6$ -DMSO.

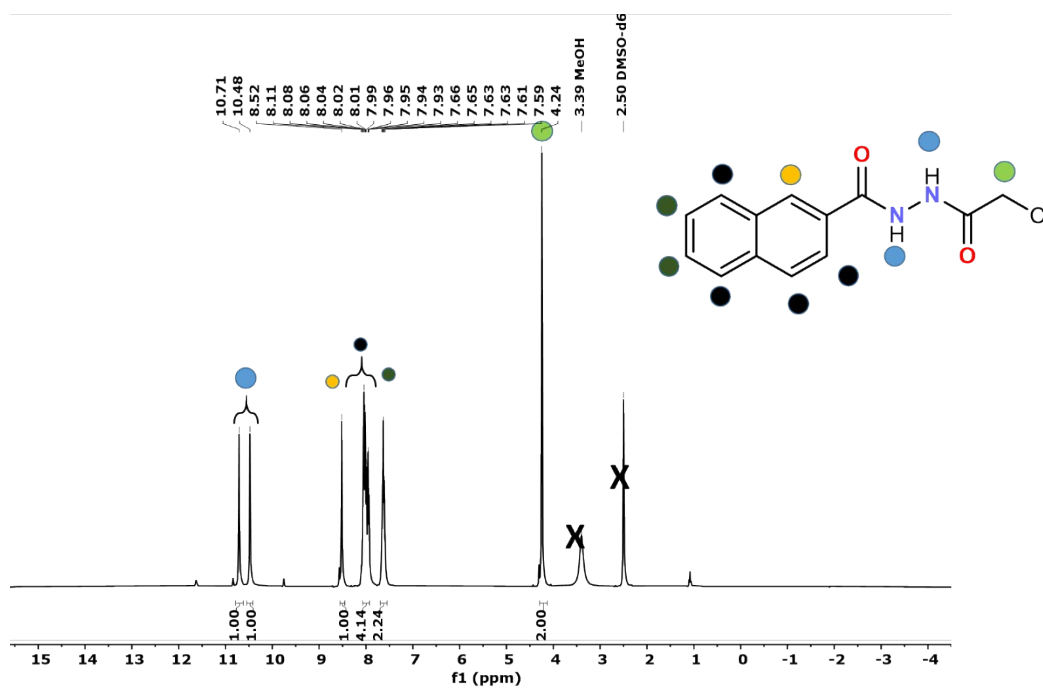

Figure S3:  $^1\text{H}$ -NMR-spectra of  $\text{N}^1$ -(2-chloroacetyl)-2-naphthohydrazide (III) in  $\text{D}^6$ -DMSO.

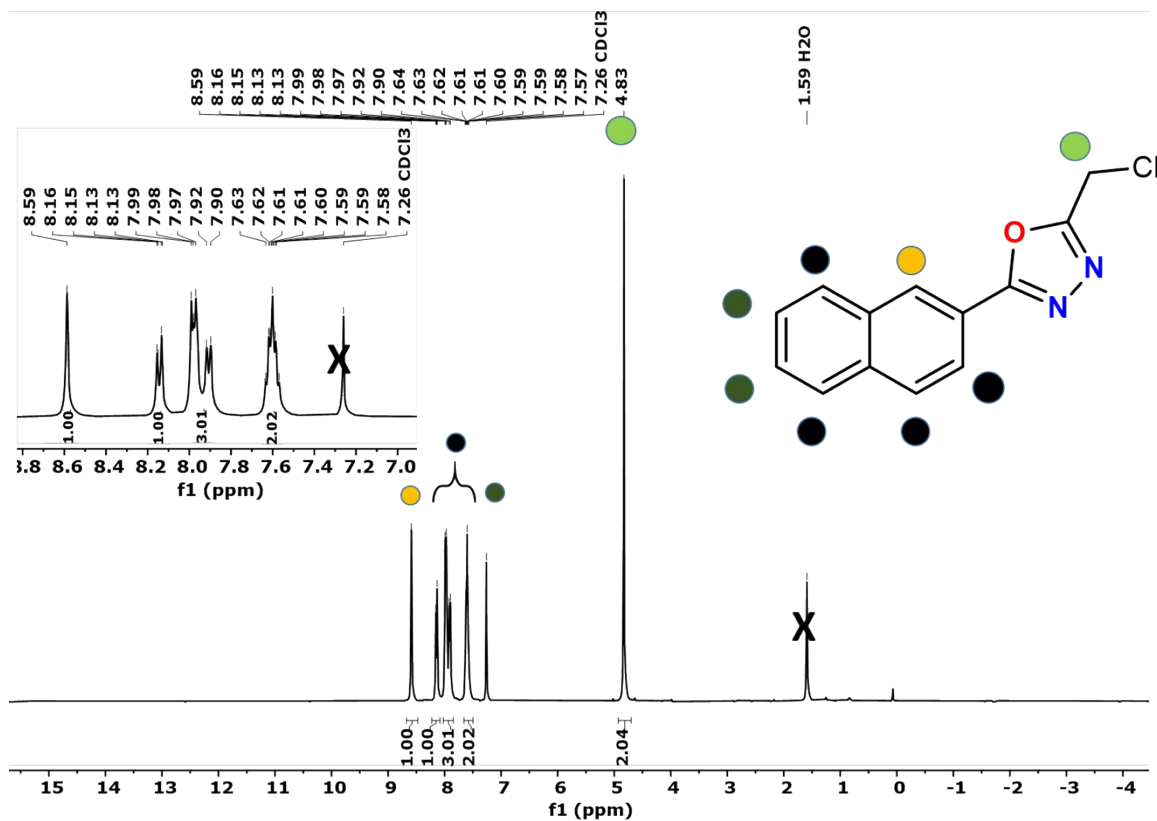

**Figure S4:**  $^1\text{H-NMR}$ -spectra of 2-(Chloromethyl)-5-(naphthalen-2-yl)-1,3,4-oxadiazole (IV) in  $\text{D}_6\text{-CDCl}_3$ .

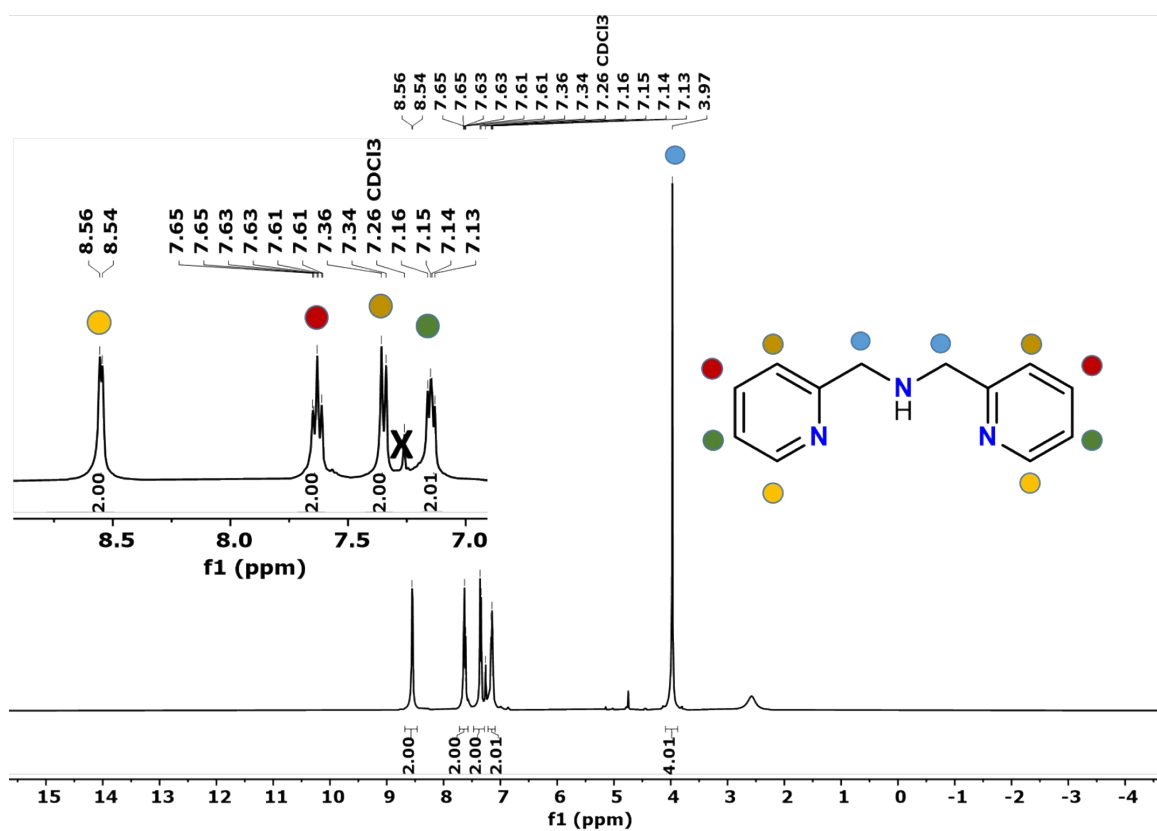

**Figure S5:**  $^1\text{H-NMR}$ -spectra of Bis[(2-pyridyl)methyl]amine (V) in  $\text{CDCl}_3$ .

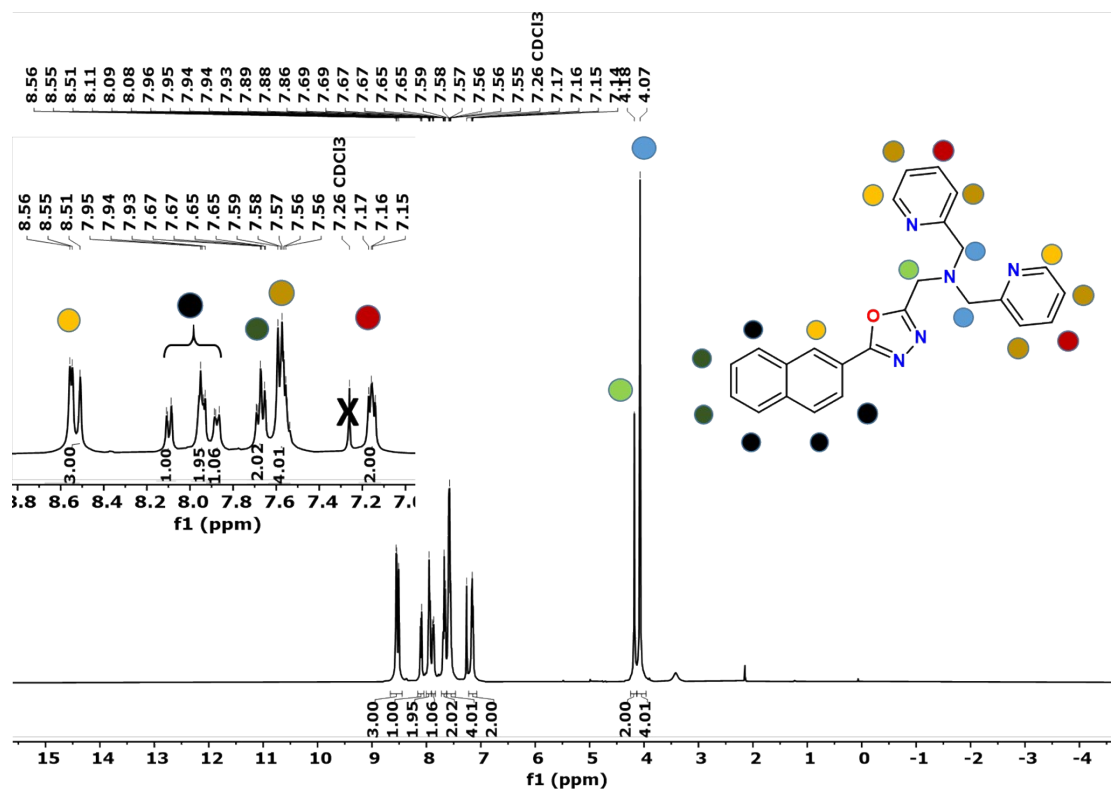

**Figure S6:**  $^1\text{H}$ -NMR-spectra of 2-(Naphthalen-2-yl)-5-[N,N-bis(2-pyridylmethyl)aminomethyl]-1,3,4-oxadiazole ( $\text{L}^{\text{Tetra-ODA}}$ ) in  $\text{CDCl}_3$ .

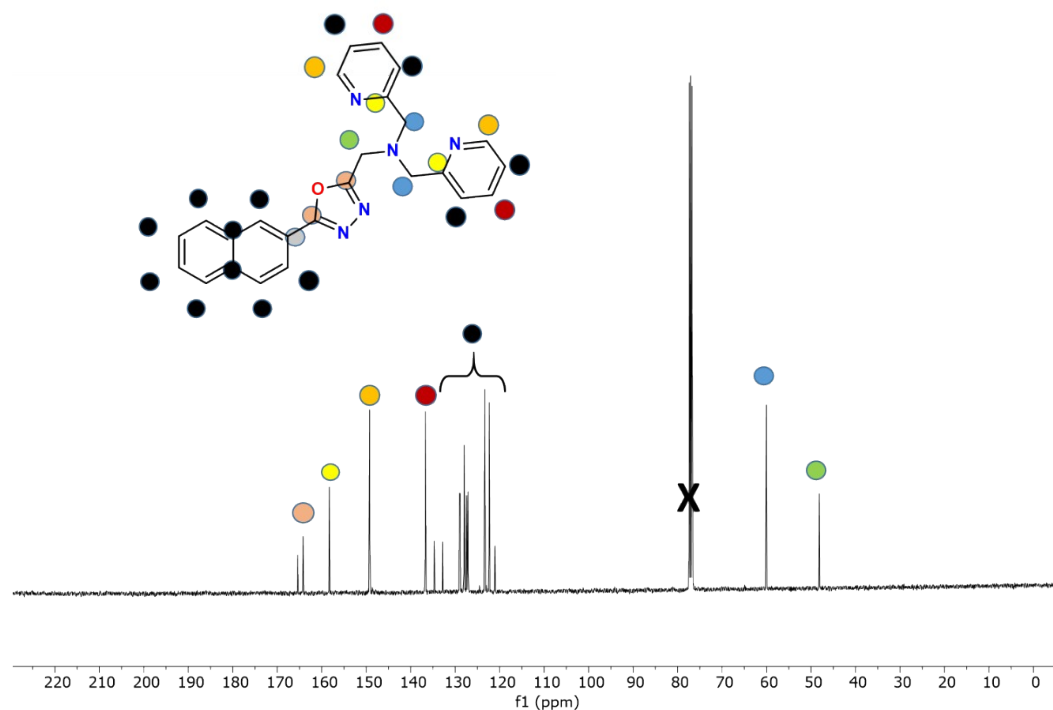

**Figure S7:**  $^{13}\text{C}$ -NMR-spectra of 2-(Naphthalen-2-yl)-5-[N,N-bis(2-pyridylmethyl)aminomethyl]-1,3,4-oxadiazole ( $\text{L}^{\text{Tetra-ODA}}$ ) in  $\text{CDCl}_3$ .

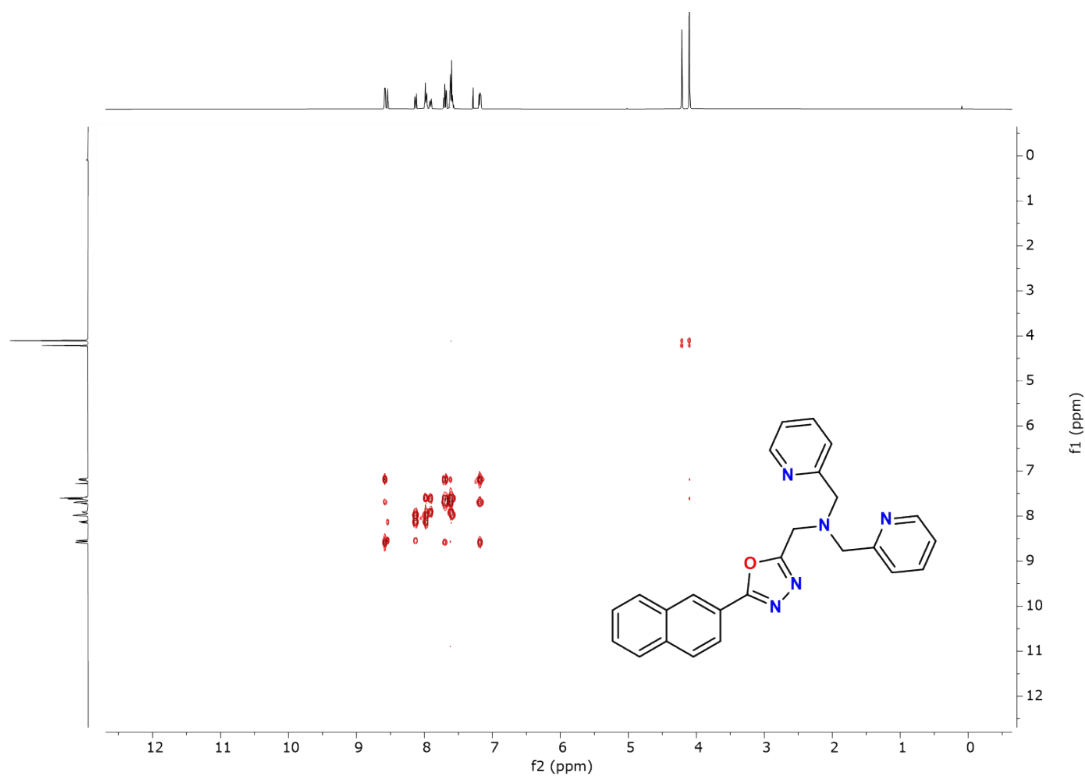

**Figure S8:** COSY-NMR-spectra of (**L<sup>Tetra-ODA</sup>**) 2-(Naphthalen-2-yl)-5-[N,N-bis(2-pyridylmethyl)aminomethyl]-1,3,4-oxadiazole in CDCl<sub>3</sub>.

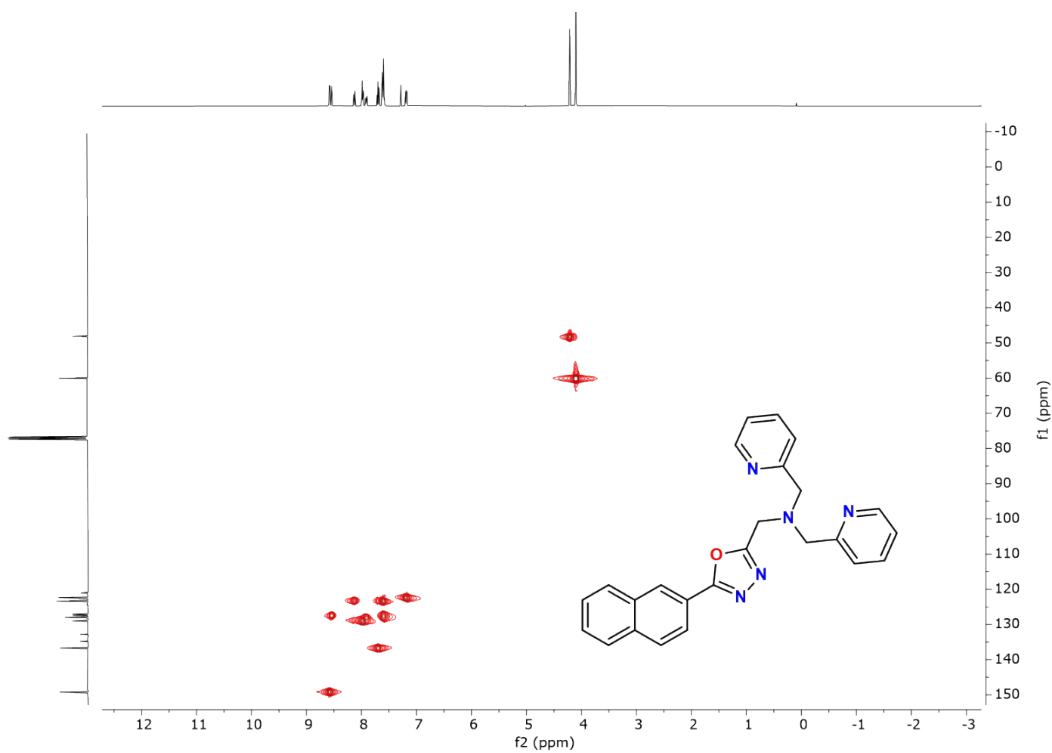

**Figure S9:** HSCQ-NMR-spectra of 2-(Naphthalen-2-yl)-5-[N,N-bis(2-pyridylmethyl)aminomethyl]-1,3,4-oxadiazole (**L<sup>Tetra-ODA</sup>**) in CDCl<sub>3</sub>.



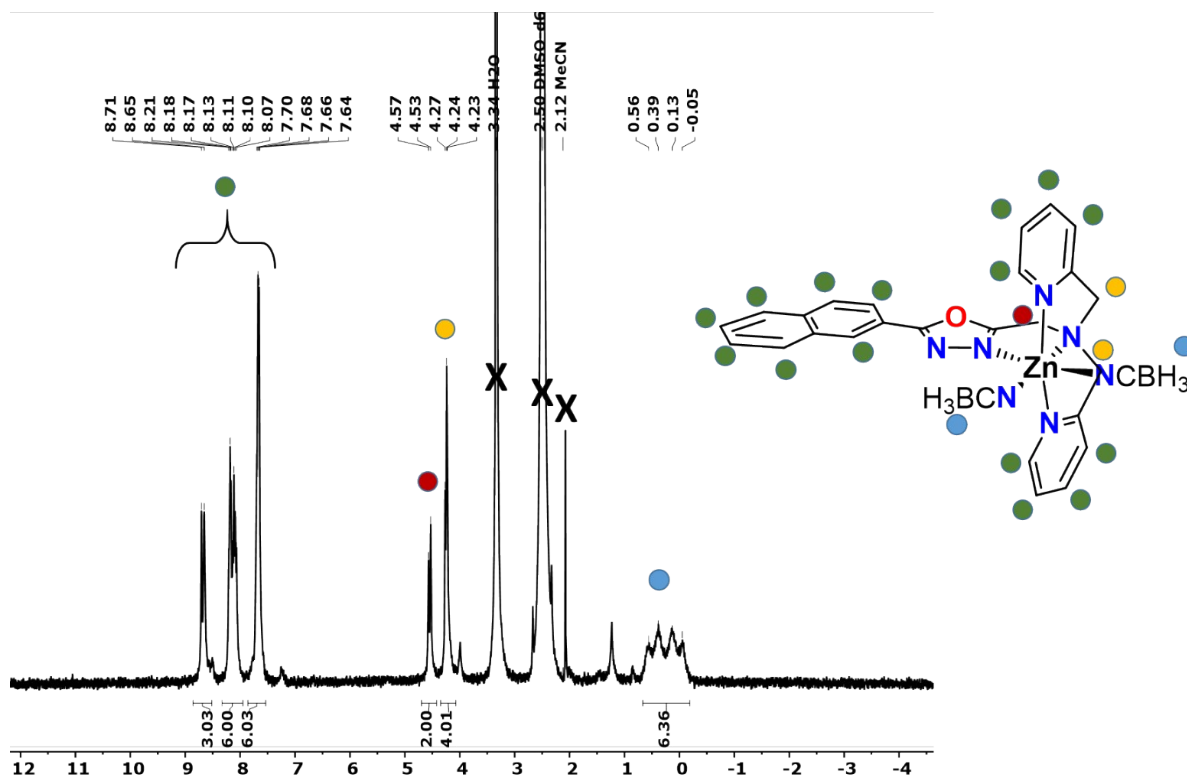

**Figure S12:**  $^1H$ -NMR-spectra of  $[Zn(L^{Tetra-ODA})(NCBH_3)_2] \cdot 0.5H_2O$  (C2) in  $D^6$ -DMSO.

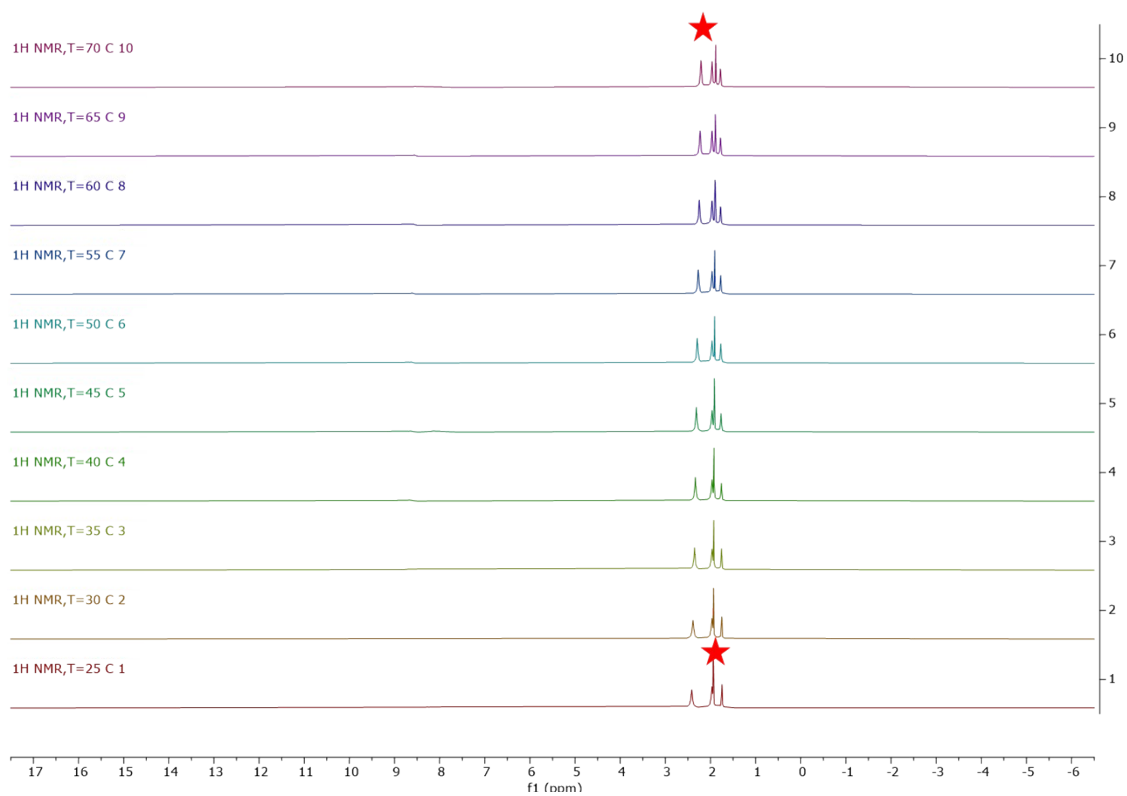

**Figure S13:** Temperature dependent Evans-measurement of  $[Fe(L^{Tetra-ODA})(NCBH_3)_2] \cdot 1.5CH_3OH$  in  $D^3$ -MeCN.



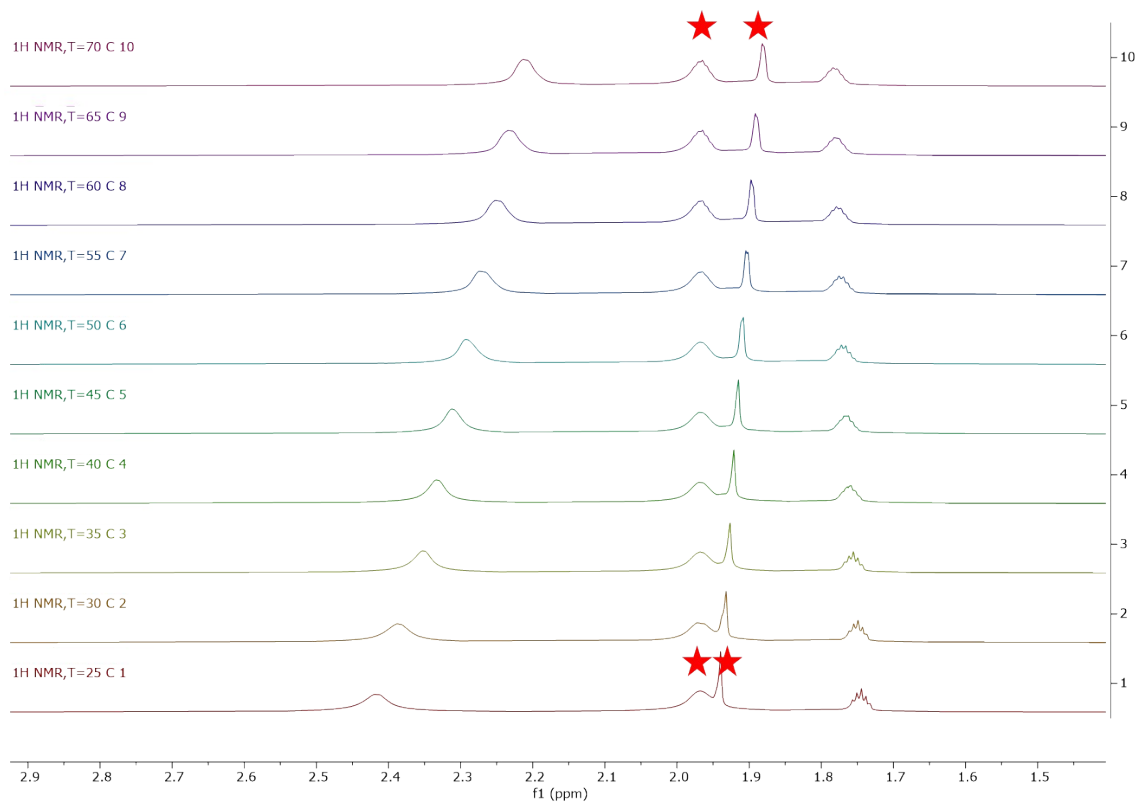

**Figure S14:** Temperature dependent Evans-measurement of  $[\text{Fe}(\text{L}^{\text{Tetra-ODA}})(\text{NCBH}_3)_2] \cdot 1.5\text{CH}_3\text{OH}$  in  $\text{D}^3\text{-MeCN}$ .

## 2. IR-spectra:

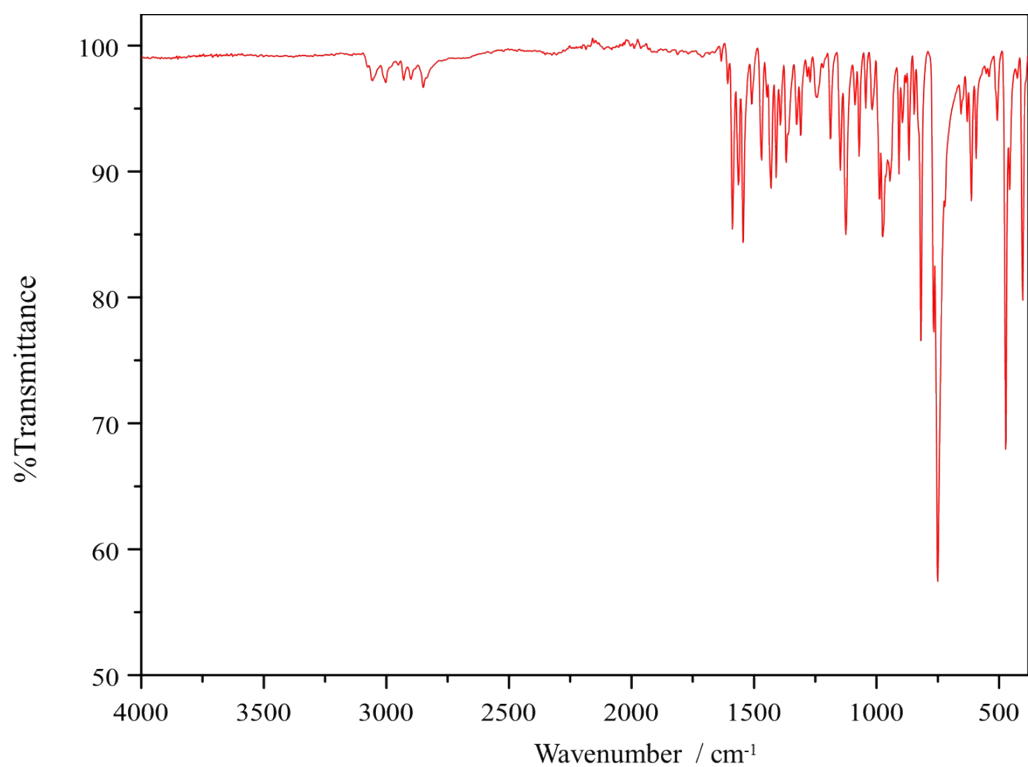

**Figure S15:** IR spectrum of 2-(Naphthalen-2-yl)-5-[N,N-bis(2-pyridylmethyl)aminomethyl]-1,3,4-oxadiazole ( $L^{\text{Tetra-ODA}}$ ).

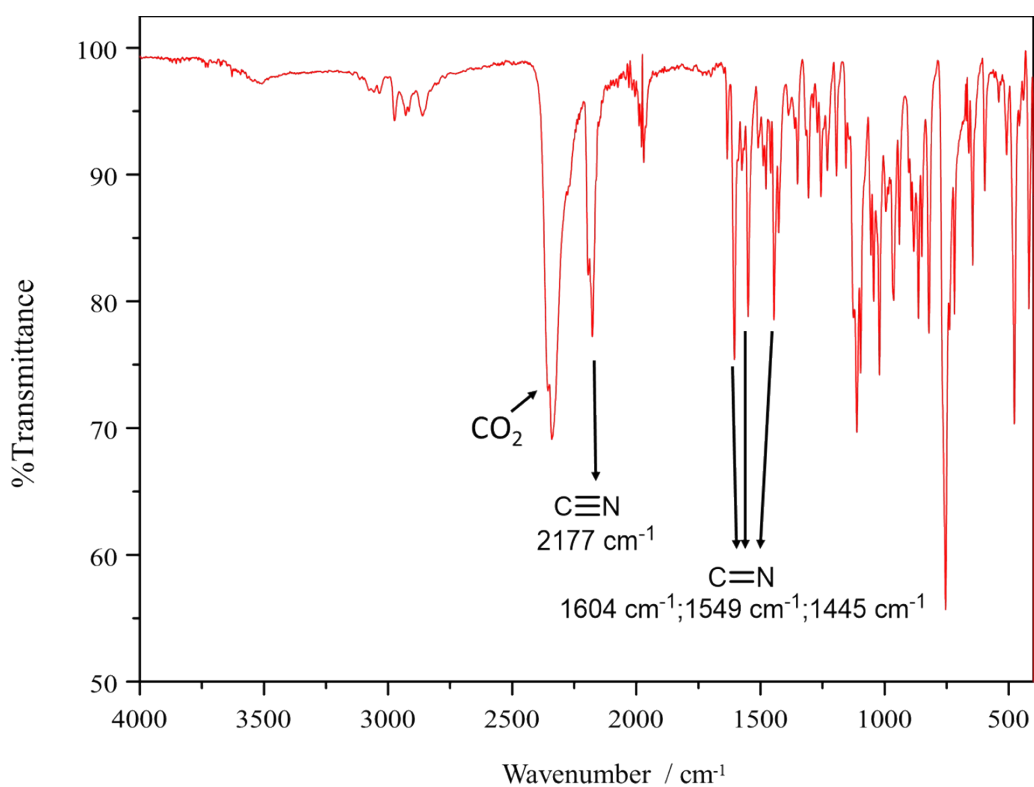

**Figure S16:** IR spectrum of  $[\text{Fe}(L^{\text{Tetra-ODA}})(\text{NCBH}_3)_2] \cdot 1.5 \text{CH}_3\text{OH}$  (**C1**)

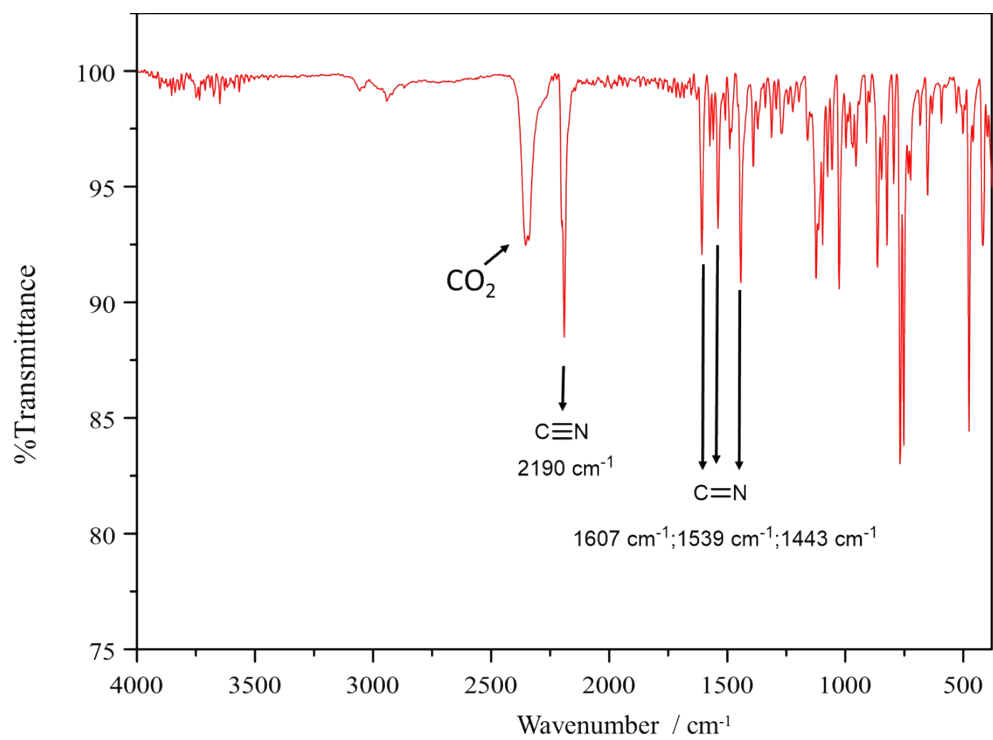

**Figure S17:** IR spectrum of  $[\text{Zn}(\text{L}^{\text{Tetra-ODA}})(\text{NCBH}_3)_2] \cdot 0.5\text{H}_2\text{O}$  (**C2**).

### 3. Mass spectra:

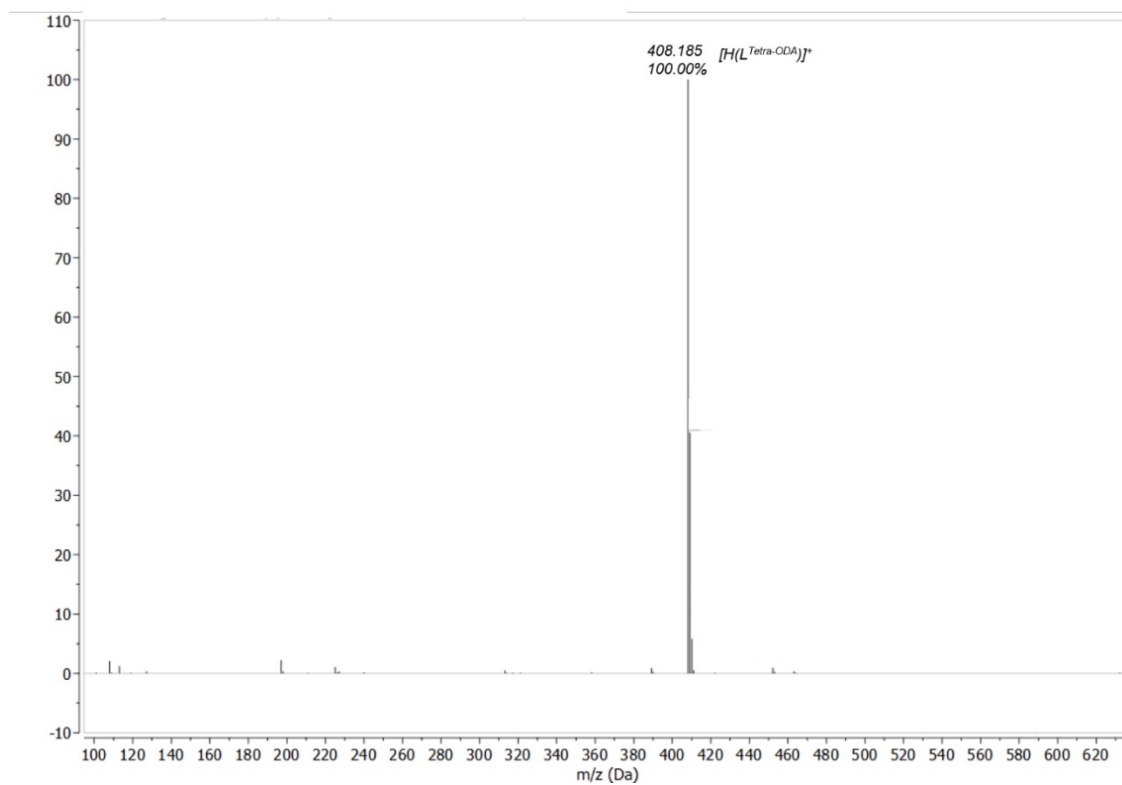

**Figure S18:** ESI mass spectrum of 2-(Naphthalen-2-yl)-5-[N,N-bis(2-pyridylmethyl)aminomethyl]-1,3,4-oxadiazole ( $L^{Tetra-ODA}$ ).

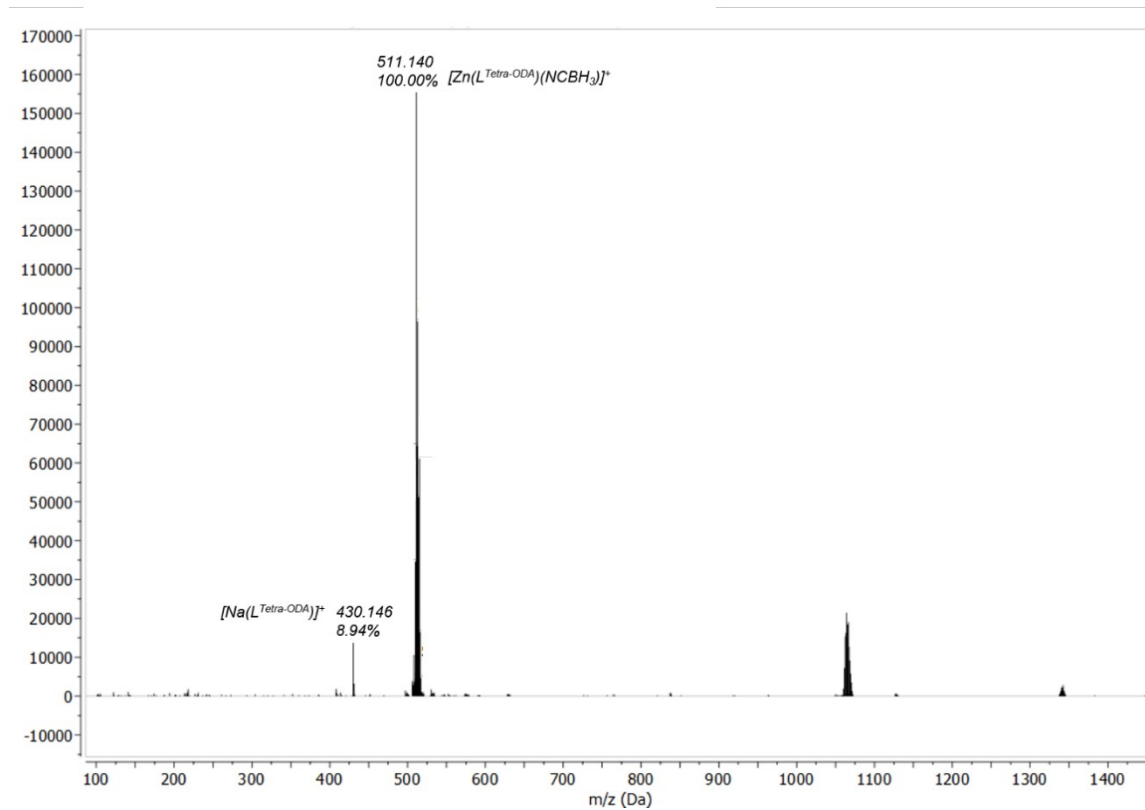

**Figure S19:** ESI mass spectrum of  $[Zn(L^{Tetra-ODA})(NCBH_3)_2] \cdot 0.5H_2O$ .

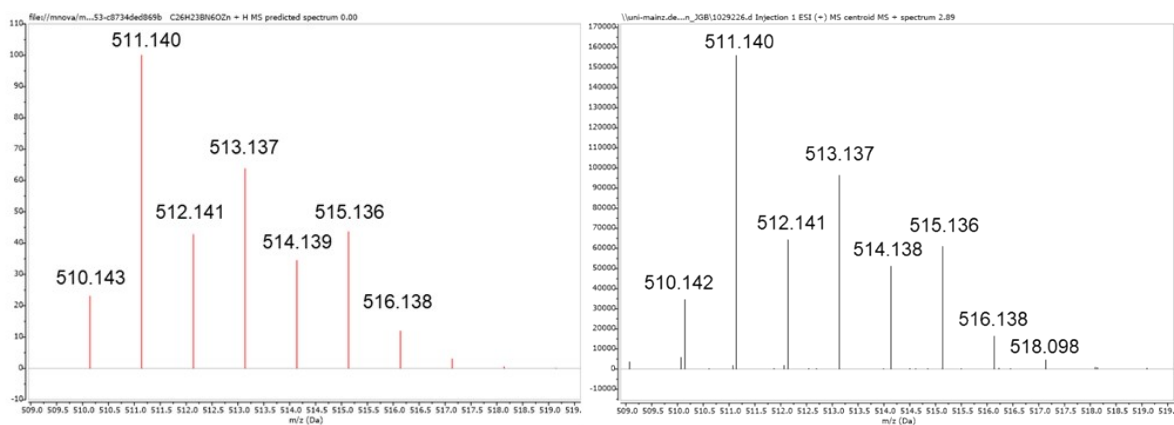

**Figure S20:** Isotopic pattern of ESI mass spectra of  $[Zn(L^{Tetra-ODA})(NCBH_3)_2] \cdot 0.5H_2O$  : *predicted (left) and measured (right).*

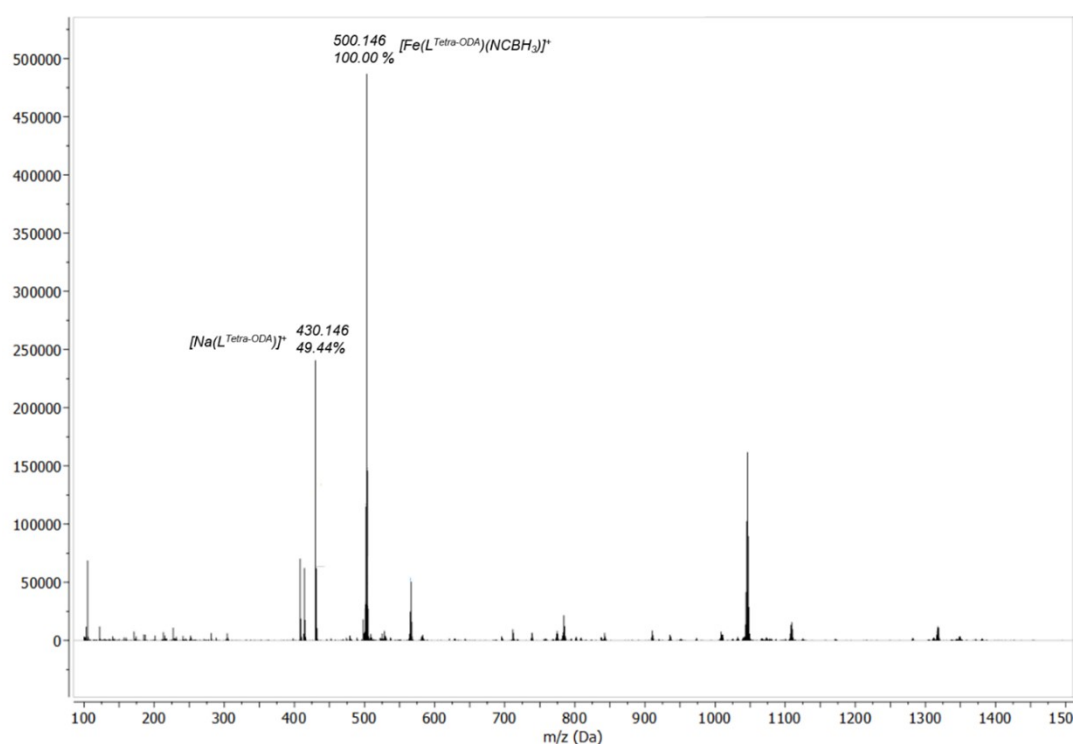

**Figure S21:** ESI mass spectrum of  $[Fe(L^{Tetra-ODA})(NCBH_3)_2] \cdot 1.5 CH_3OH$  (C1)

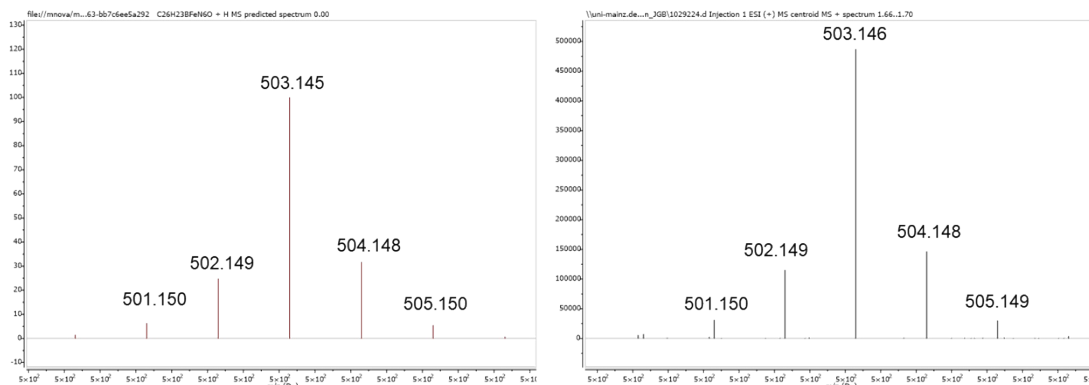

**Figure S22:** Isotopic pattern of ESI mass spectra of  $[Fe(L^{Tetra-ODA})(NCBH_3)_2] \cdot 1.5 CH_3OH$  (C1): *predicted (left) and measured (right).*

## 4. Crystal structures:

**Table S1:** Crystallographic Data of  $[\text{Fe}(\text{L}^{\text{Tetra-ODA}})(\text{NCBH}_3)_2] \cdot 1.5 \text{ CH}_3\text{OH}$  at 220 K and 120 K

| Compound                                                  | C1 (220 K)                                                                            | C1 (120 K)                                                                            |
|-----------------------------------------------------------|---------------------------------------------------------------------------------------|---------------------------------------------------------------------------------------|
| Empirical formula                                         | $(\text{C}_{27}\text{H}_{27}\text{B}_2\text{FeN}_7\text{O}) 1.5(\text{CH}_4\text{O})$ | $(\text{C}_{27}\text{H}_{27}\text{B}_2\text{FeN}_7\text{O}) 1.5(\text{CH}_4\text{O})$ |
| Formula weight / g mol <sup>-1</sup>                      | 591.09                                                                                | 591.09                                                                                |
| Crystal size / mm                                         | 0.2 x 0.187 x 0.18                                                                    | 0.23 x 0.19 x 0.15                                                                    |
| Crystal system                                            | monoclinic                                                                            | monoclinic                                                                            |
| Space group                                               | <i>C2/c</i>                                                                           | <i>C2/c</i>                                                                           |
| Unit cell dimensions                                      |                                                                                       |                                                                                       |
| <i>a</i> / Å                                              | 26.7229(7)                                                                            | 26.0632(7)                                                                            |
| <i>b</i> / Å                                              | 10.9749(2)                                                                            | 10.5691(2)                                                                            |
| <i>c</i> / Å                                              | 21.1290(6)                                                                            | 21.3067(6)                                                                            |
| $\alpha$ / °                                              | 90                                                                                    | 90                                                                                    |
| $\beta$ / °                                               | 95.813(2)                                                                             | 96.182(2)                                                                             |
| $\gamma$ / °                                              | 90                                                                                    | 90                                                                                    |
| Volume / Å <sup>3</sup>                                   | 6164.9(3)                                                                             | 5835.1(3)                                                                             |
| <i>Z</i>                                                  | 8                                                                                     | 8                                                                                     |
| $\rho_{\text{calc.}}$ / g cm <sup>-3</sup>                | 1.266                                                                                 | 1.346                                                                                 |
| $\mu$ / mm <sup>-1</sup>                                  | 0.528                                                                                 | 0.558                                                                                 |
| <i>F</i> (000)                                            | 2454                                                                                  | 2472                                                                                  |
| Temperature / K                                           | 220                                                                                   | 120                                                                                   |
| Diffractometer                                            | STOE STADIVARI                                                                        | STOE STADIVARI                                                                        |
| Radiation                                                 | Mo-K $\alpha$                                                                         | Mo-K $\alpha$                                                                         |
| $\vartheta$ – range for data collection / °               | 1.938 < $\vartheta$ < 31.123                                                          | 1.923 < $\vartheta$ < 30.771                                                          |
| Index ranges                                              | -38 < <i>h</i> < 36<br>-15 < <i>k</i> < 15<br>-30 < <i>l</i> < 30                     | -36 < <i>h</i> < 37<br>-15 < <i>k</i> < 15<br>-30 < <i>l</i> < 30                     |
| Collected reflections                                     | 56550                                                                                 | 51641                                                                                 |
| Independent reflections                                   | 58044                                                                                 | 53070                                                                                 |
| Completeness                                              | 0.908                                                                                 | 0.929                                                                                 |
| Max. and min. transmission                                | 0.9893 and 0.4678                                                                     | 0.9090 and 0.2842                                                                     |
| <i>R</i> <sub>int</sub>                                   | 0.0364                                                                                | 0.0308                                                                                |
| <i>R</i> <sub>sigma</sub>                                 | 0.0318                                                                                | 0.0291                                                                                |
| Data/ restraints/ parameters                              | 9010 / 38 / 404                                                                       | 8470 / 31 / 403                                                                       |
| Goodness-of-fit on <i>F</i> <sup>2</sup>                  | 0.977                                                                                 | 1.078                                                                                 |
| Final <i>R</i> <sub>1</sub> [ <i>I</i> ≥ 2σ( <i>I</i> )]  | 0.0455                                                                                | 0.0444                                                                                |
| Final <i>wR</i> <sub>2</sub> [ <i>I</i> ≥ 2σ( <i>I</i> )] | 0.1354                                                                                | 0.1316                                                                                |
| Final <i>R</i> <sub>1</sub> [ <i>all data</i> ]           | 0.0638                                                                                | 0.0573                                                                                |
| Final <i>wR</i> <sub>2</sub> [ <i>all data</i> ]          | 0.1438                                                                                | 0.1369                                                                                |

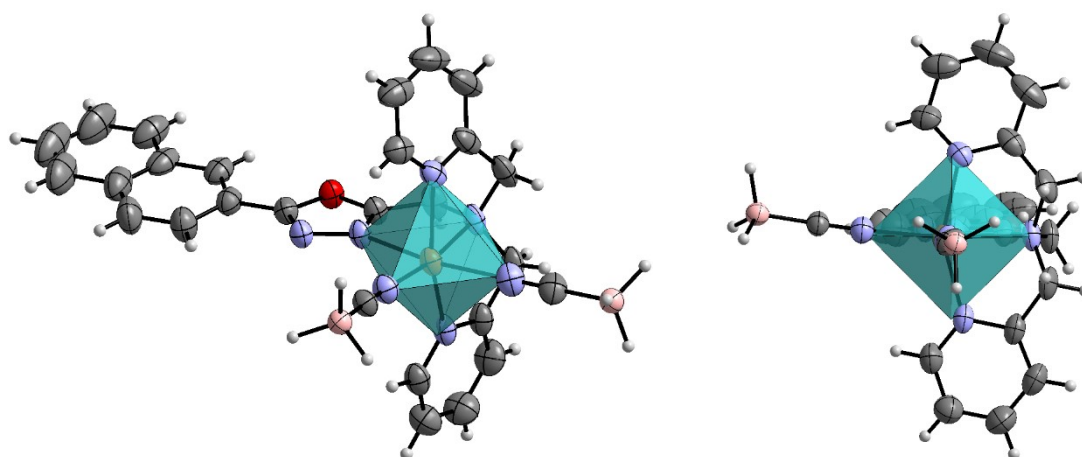

**Figure S23:** Molecular structure of  $[Fe(L^{Tetra-ODA})(NCBH_3)_2] \cdot 1.5 CH_3OH$  and its ideal coordination octahedron with front view (left) and view along the Fe-N5 axis (right), calculated with SHAPE. Colour scheme: dark grey – C, grey – H, violet – N, red – O, bright orange – Se, orange – Fe. ORTEP representation with atomic displacement parameters set to 50 % probability.

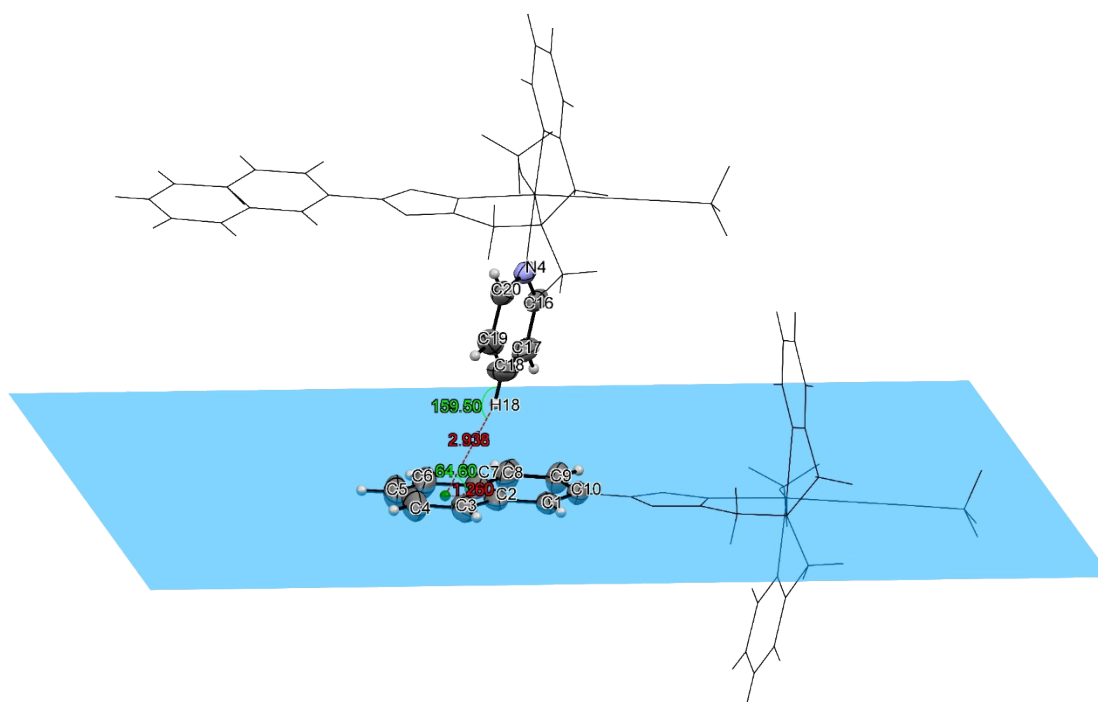

**Figure S24:** C-H... $\pi$  interaction in  $[Fe(L^{Tetra-ODA})(NCBH_3)_2] \cdot 1.5 CH_3OH$  (240 K). Least-squares plane A is defined by C2, C3, C4, C5, C6 and C7. Interacting C-H fragment is labeled as C18-H18. Green point – center of the aromatic ring in A. Purple point – orthogonal intersection of H18 onto plane A. Offset  $r = 1.26 \text{ \AA}$ , interaction distance  $d_{QH} = 2.94 \text{ \AA}$ ,  $\alpha = 159.5^\circ$  and  $\beta = 64.6^\circ$ . ORTEP representation with atomic displacement parameters set to 50 % probability.

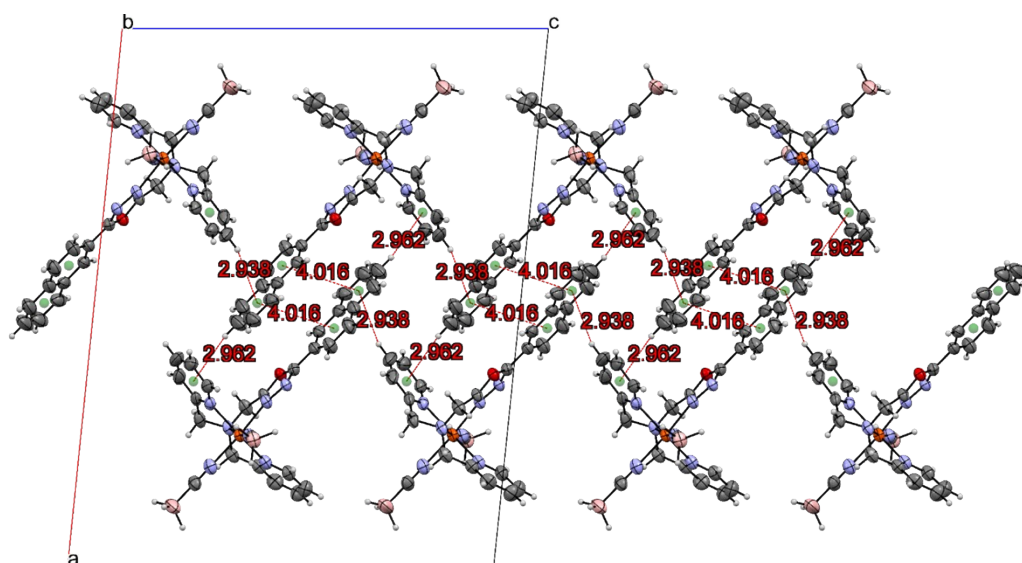

**Figure S25:** One-dimensional network of “complex dimers” in  $[\text{Fe}(\text{L}^{\text{Tetra-ODA}})(\text{NCBH}_3)_2] \cdot 1.5 \text{ CH}_3\text{OH}$ . Red dashed lines represent intermolecular distances. Colour scheme: pink – B, dark grey – C, grey – H, violet – N, red – O, orange – Fe. ORTEP representation with atomic displacement parameters set to 50 % probability.

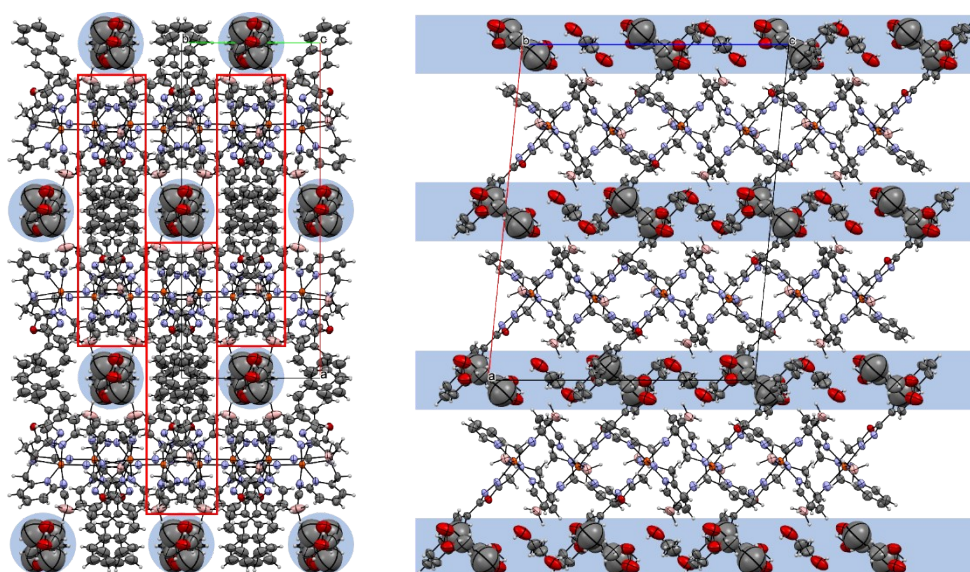

**Figure S26:** Packing of  $[\text{Fe}(\text{L}^{\text{Tetra-ODA}})(\text{NCBH}_3)_2] \cdot 1.5 \text{ CH}_3\text{OH}$  with view along the c-axis (left) and view along the b-axis (right). Red rectangles mark the one-dimensional chains of complex molecules along the c-axis. Blue areas illustrate the channel of solvent molecules. Colour scheme: pink – B, dark grey – C, grey – H, violet – N, red – O, orange – Fe. ORTEP representation with atomic displacement parameters set to 50 % probability.



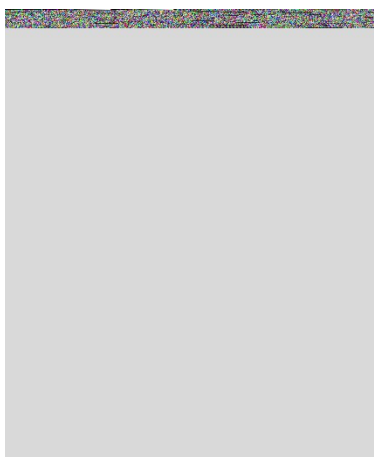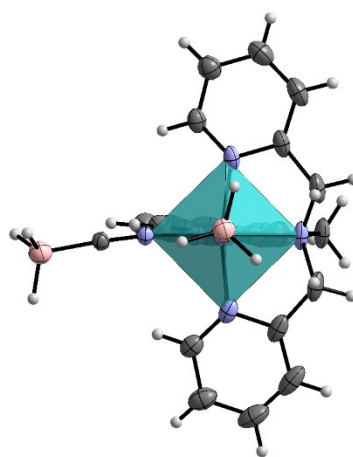

**Figure S27:** Molecular structure of  $[\text{Fe}(\text{L}^{\text{Tetra-ODA}})(\text{NCBH}_3)_2] \cdot 1.5 \text{CH}_3\text{OH}$  and its ideal coordination octahedron with view along the Fe-N5 axis at 220 K (left) and 120 K (right), calculated with SHAPE. Colour scheme: pink – B, dark grey – C, grey – H, violet – N, red – O, orange – Fe. ORTEP representation with atomic displacement parameters set to 50 % probability.

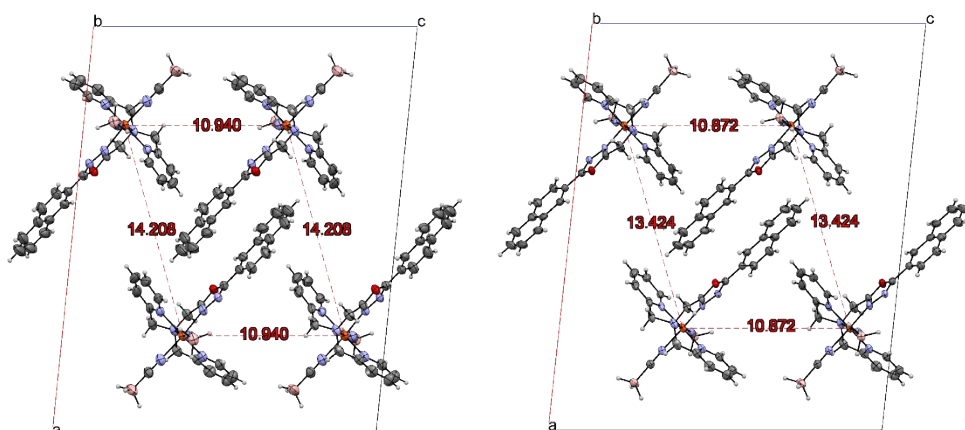

**Figure S28** One-dimensional network of “complex dimers” in  $[\text{Fe}(\text{L}^{\text{Tetra-ODA}})(\text{NCBH}_3)_2] \cdot 1.5 \text{CH}_3\text{OH}$  at 220 K (left) and 120 K (right). Unit cell changes are remarkably more pronounced along the a-axis, which corresponds to the interdimer short contacts. Red dashed lines represent intermolecular distances between iron(II) centers. Colour scheme: pink – B, dark grey – C, grey – H, violet – N, red – O, orange – Fe. ORTEP representation with atomic displacement parameters set to 50 % probability.

## 5. UV-Vis-Spectra:

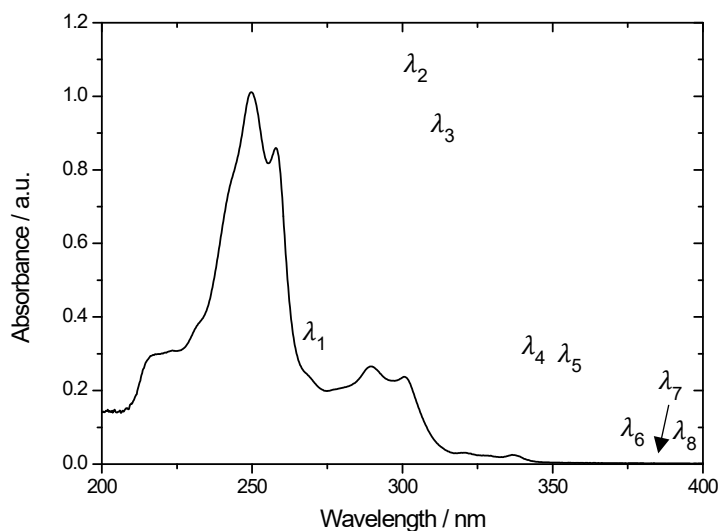

**Figure S29:** UV-Vis spectrum of  $L^{\text{Tetra-ODA}}$  in n-butyronitril ( $c = 0.03 \text{ mmol/l}$ ).

**Table S2:** Summary of the present absorption maxima  $\lambda_i$  in the UV/Vis spectrum of  $L^{\text{Tetra-ODA}}$  in n-butyronitril with corresponding molar extinction coefficients ( $\epsilon$ ) in  $\text{M}^{-1}\text{cm}^{-1}$ .

|                                          | $\lambda_1$ | $\lambda_2$ | $\lambda_3$ | $\lambda_4$ | $\lambda_5$ | $\lambda_6$ | $\lambda_7$ | $\lambda_8$ |
|------------------------------------------|-------------|-------------|-------------|-------------|-------------|-------------|-------------|-------------|
| $\lambda_{\text{abs}} / \text{nm}$       | 216         | 249         | 258         | 289         | 300         | 320         | 328         | 337         |
| $\epsilon / \text{M}^{-1}\text{cm}^{-1}$ | 15084       | 79001       | 67250       | 13506       | 11902       | 1068        | 775         | 850         |

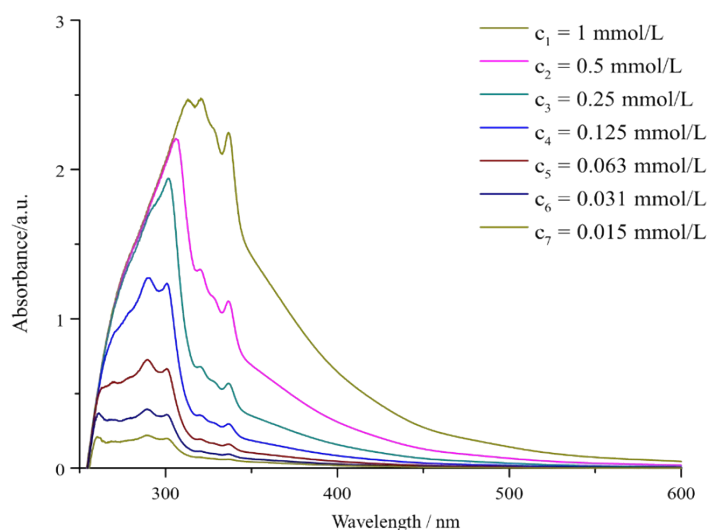

**Figure 30:** UV/Vis spectra of  $[\text{Fe}(\text{L}^{\text{Tetra-ODA}})(\text{NCBH}_3)_2] \cdot 1.5 \text{ CH}_3\text{OH}$  in n-butyronitrile for different concentrations. From measurement to measurement, the concentration was halved by diluting the solution. There is no absorption observable between 600-1000 nm.

**Table S3:** Summary of the present absorption maxima  $\lambda_i$  in the UV/Vis spectra of  $[\text{Fe}(\text{L}^{\text{Tetra-ODA}})(\text{NCBH}_3)_2] \cdot 1.5 \text{ CH}_3\text{OH}$  in n-butyronitrile with corresponding molar extinction coefficients  $\epsilon$  in  $\text{M}^{-1}\text{cm}^{-1}$ .

|                                          | $\lambda_1$ | $\lambda_2$ | $\lambda_3$ | $\lambda_4$ | $\lambda_5$ | $\lambda_6$ |
|------------------------------------------|-------------|-------------|-------------|-------------|-------------|-------------|
| $\lambda_{\text{abs}} / \text{nm}$       | 258         | 289         | 301         | 320         | 328         | 337         |
| $\epsilon / \text{M}^{-1}\text{cm}^{-1}$ | 2657        | 2729        | 3192        | 12488       | 13588       | 12890       |

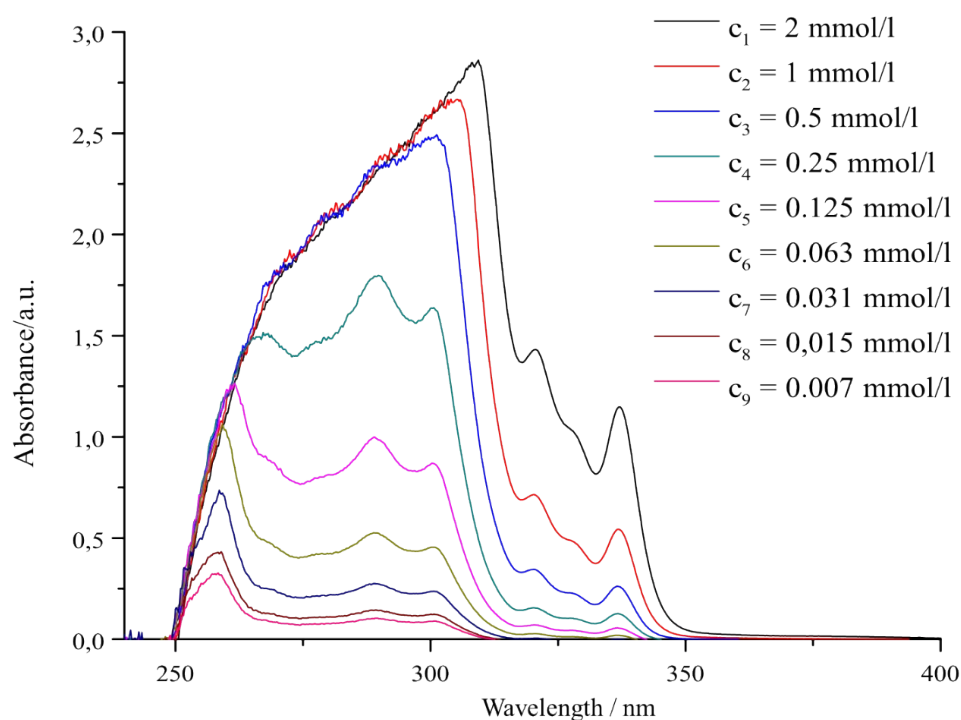

**Figure S31:** UV/Vis spectra of  $[\text{Zn}(\text{L}^{\text{Tetra-ODA}})(\text{NCBH}_3)_2] \cdot 0.5\text{H}_2\text{O}$  in n-butyronitrile for different concentrations. From measurement to measurement, the concentration was halved by diluting the solution. There is no absorption observable between 400-1000 nm.

## 6. Photoluminescence spectroscopy

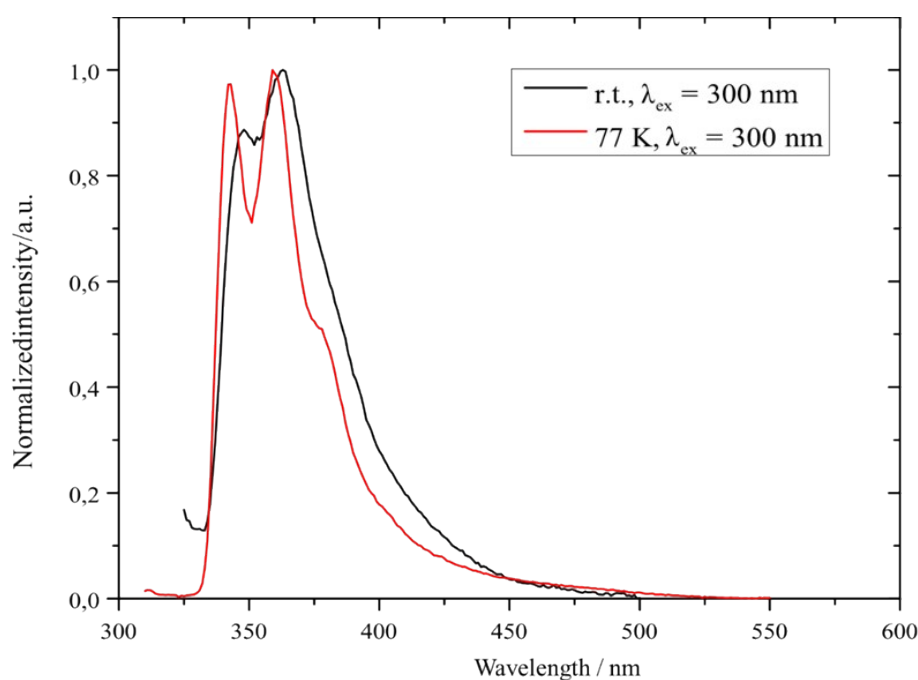

**Figure S32:** PL-spectra of  $[\text{Fe}(\text{L}^{\text{Tetra-ODA}})(\text{NCBH}_3)_2] \cdot 1.5 \text{CH}_3\text{OH}$  in solid state. Samples were excited with  $\lambda_{\text{ex}} = 300 \text{ nm}$ . Measurements were done at 77 K (red solid lines) and at room temperature (black solid lines).

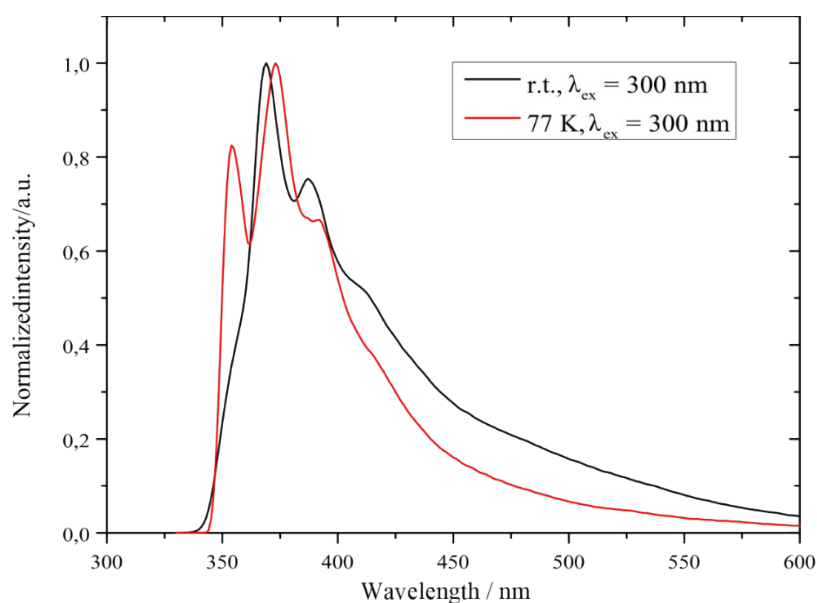

**Figure S33:** PL-spectra of  $[\text{Zn}(\text{L}^{\text{Tetra-ODA}})(\text{NCBH}_3)_2] \cdot 0.5\text{H}_2\text{O}$  in solid state. Samples were excited with  $\lambda_{\text{ex}} = 300 \text{ nm}$ . Measurements were done at 77 K (red solid lines) and at room temperature (black solid lines).

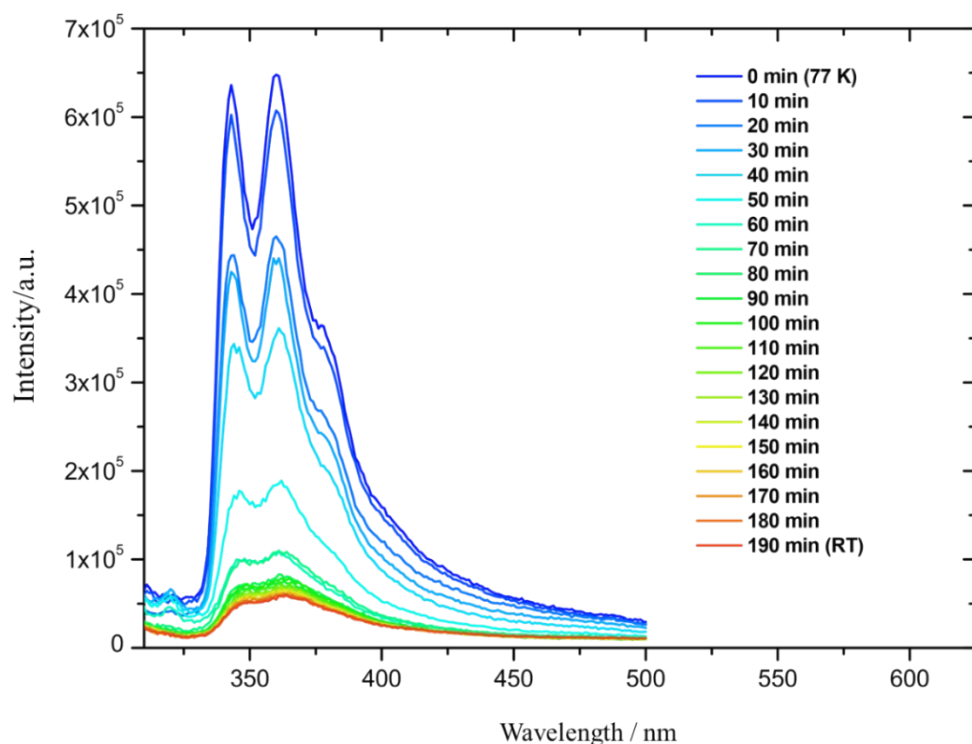

**Figure S34:** Emission spectra of  $[\text{Fe}(\text{L}^{\text{Tetra-ODA}})(\text{NCBH}_3)_2] \cdot 1.5 \text{CH}_3\text{OH}$  between 310 nm and 500 nm for a series of time related measurements. During the measured 190 min, liquid nitrogen was allowed to evaporate, which results in a heating of the sample.

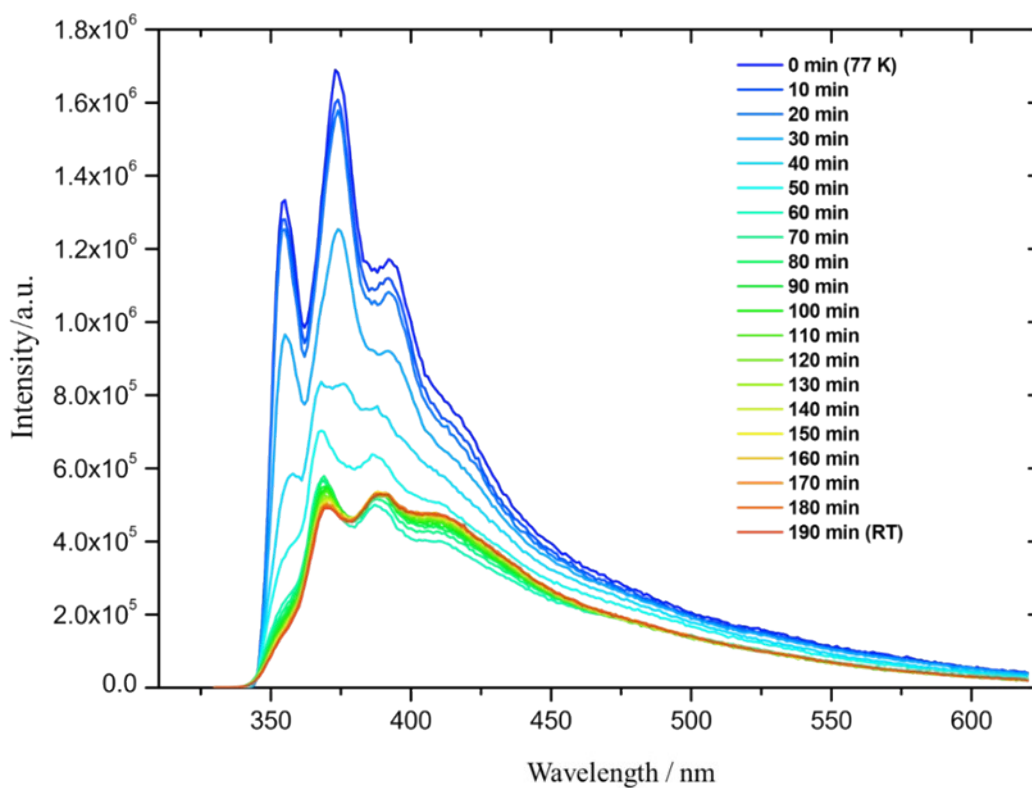

**Figure S35:** Emission spectra of  $[\text{Zn}(\text{L}^{\text{Tetra-ODA}})(\text{NCBH}_3)_2] \cdot 0.5\text{H}_2\text{O}$  between 310 nm and 625 nm for a series of time related measurements. During the measured 190 min, liquid nitrogen was allowed to evaporate, which results in a heating of the sample.

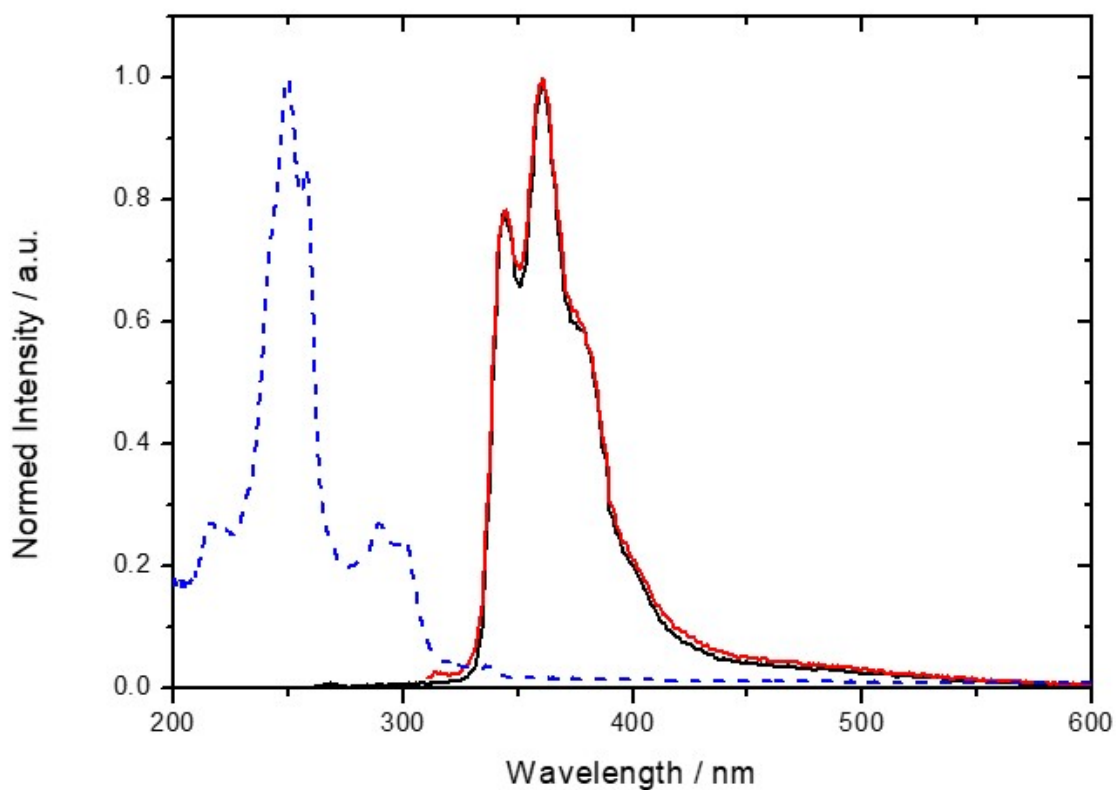

**Figure S36:** Combined intensity versus wavelength plot of absorption (blue dashed line) and emission spectra with excitation wavelengths of  $\lambda_{\text{ex},1} = 249$  nm (black solid line) and  $\lambda_{\text{ex},2} = 289$  nm (red solid line) of  $\text{L}^{\text{Tetra-ODA}}$  in n-butyronitrile.

## 6. Magnetic Data:

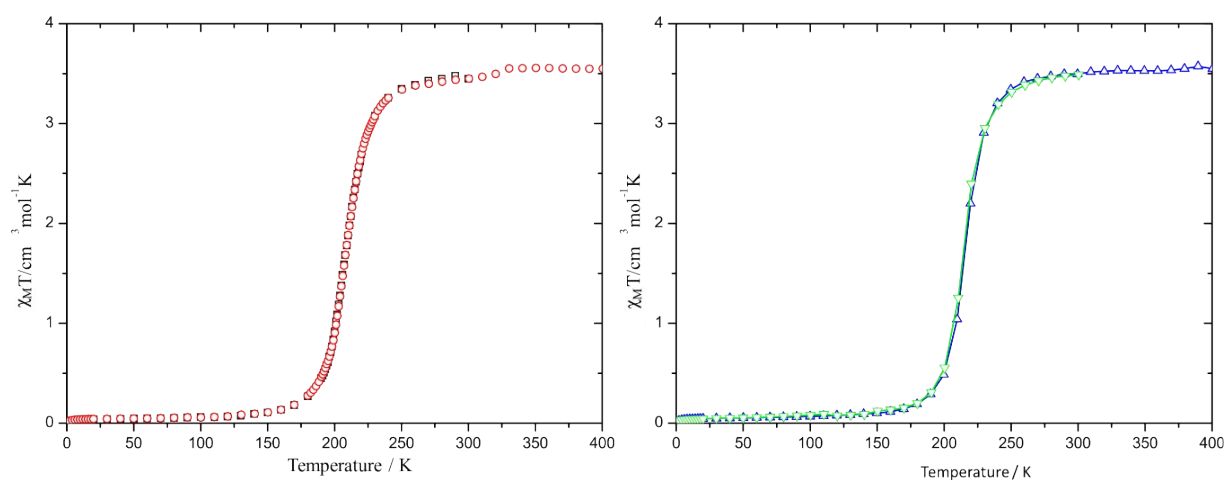

**Figure S37:** Temperature dependent magnetic behavior of single crystals of  $[\text{Fe}(\text{L}^{\text{Tetra-ODA}})(\text{NCBH}_3)_2] \cdot 1.5 \text{CH}_3\text{OH}$  in the form of  $\chi_M T$  vs.  $T$  plots. Left: Measurement between 300-2 K (black open squares) and 2-400 K (red open circles). Right: Subsequent measurement between 400-2 K (blue open triangles) and 2-300 K (green open triangles).

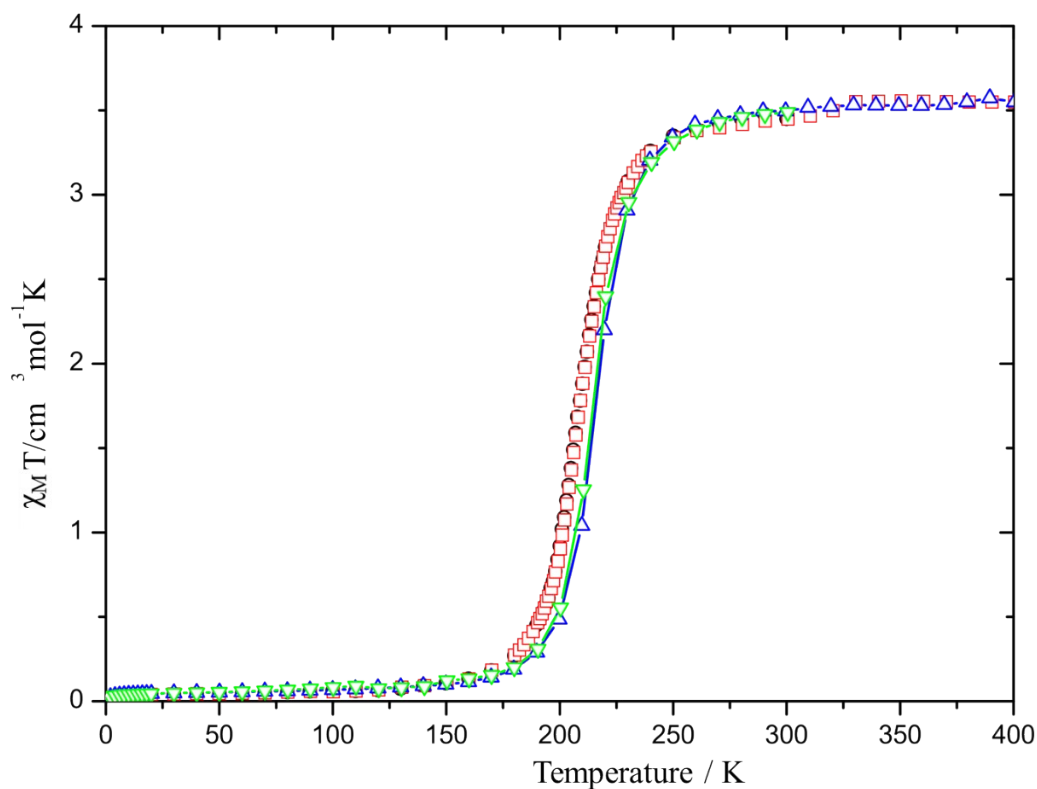

**Figure S38:** Temperature dependent magnetic behavior of single crystals of  $[Fe(L^{Tetra-ODA})(NCBH_3)_2] \cdot 1.5 CH_3OH$  after five days under air in the form of the resulting  $\chi_M T$  vs.  $T$  plot. Magnetic susceptibility was determined between 300-100 K (black open circles), 100-300 K (red open squares), 300-100 K (blue open squares) and 100-300 K (green open triangles).

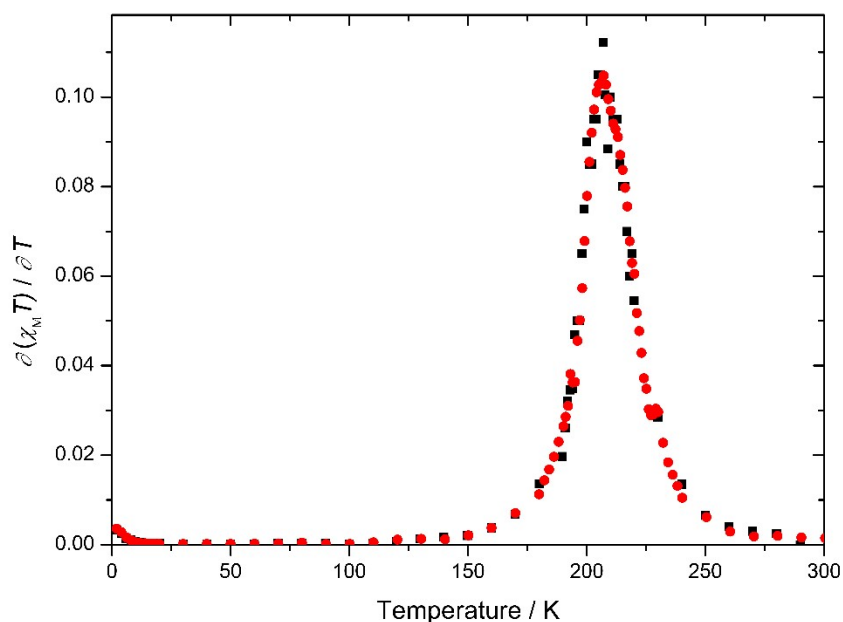

**Figure S39:** First derivative of  $\chi_M T$  with respect to  $T$  for  $[Fe(L^{Tetra-ODA})(NCBH_3)_2] \cdot 1.5 CH_3OH$ . Susceptibility was measured from 300 K to 2 K (black open squares) and subsequently from 2 K to 400 K (red open circles).

The variable temperature Evans NMR data was measured in CD<sub>3</sub>CN at a concentration of 5.06 X 10<sup>-3</sup> M, from 298 to 343 K (at 5 K intervals) in heating mode  $[Fe(L^{Tetra-ODA})(NCBH_3)_2] \cdot H_2O$ . Once the temperature is reached the sample is stabilized at that temperature for two minutes at each step before measuring. The methodology to calculate  $\chi_M T$  from Evans <sup>1</sup>H NMR method data at a range of temperatures has been previously described.<sup>1-2</sup>

The modelling of each dataset as a gradual and complete SCO, using the regular solution model, equation (1) below,<sup>3-4</sup> resulted in good fits with R<sup>2</sup>=0.98. For each data set, the fit gives  $\Delta H$  and  $\Delta S$ , the thermodynamic enthalpy and entropy values associated with the spin crossover. From these two values the T<sub>1/2</sub> value can be calculated, simply by dividing  $\Delta H/\Delta S$ , as  $\Delta G = 0$  at T<sub>1/2</sub> (and  $\Delta G = \Delta H - T\Delta S$ ). The derived parameters are reported in Tables S1 and S2.

$$\chi_M T(T) = \chi_M T(\max) / 1 + e^{(-\Delta H/RT) + (\Delta S/R)} \quad (S1)^{3-4}$$

Where:

$\chi_M T(T)$  is  $\chi_M T$  measured at temperature T,

$\chi_M T(\max)$  is the maximum  $\chi_M T$  value, which herein was set to 4.0 emu K mol<sup>-1</sup> as this value falls within the expected literature range for iron(II) complexes.<sup>5-6</sup>

R is the ideal gas constant (8.314 J mol<sup>-1</sup> K<sup>-1</sup>)

Note:

The Evans method has a relative error of 5-10%,<sup>7</sup> therefore significant errors are associated with the data fitting.

**Table S4:** Solution  $\chi T$  vs T data at 5.06 X 10<sup>-3</sup> M in CD<sub>3</sub>CN solutions of  $[Fe(L^{Tetra-ODA})(NCBH_3)_2] \cdot 1.5 CH_3OH$  measured in the heating mode from 298 to 343 ± 1 K, at 5 K intervals.

| Temperature (K) | $\chi T$ (cm <sup>3</sup> . K. mol <sup>-1</sup> ) |
|-----------------|----------------------------------------------------|
| 298             | 0.5082                                             |
| 303             | 0.6703                                             |
| 308             | 0.7369                                             |
| 313             | 0.8375                                             |
| 318             | 0.9859                                             |
| 323             | 1.0078                                             |
| 328             | 1.1785                                             |
| 333             | 1.382                                              |
| 338             | 1.5611                                             |
| 343             | 1.7698                                             |



## 7. Synthesis of complex precursors

### [Fe(Py)<sub>4</sub>(NCBH<sub>3</sub>)<sub>2</sub>]**·2.5H<sub>2</sub>O**

The precursor complex used for synthesis was prepared as reported in the literature.<sup>8</sup> The following reaction was carried out under an inert atmosphere using Schlenk technique. Iron(II) tetrafluoroborate hexahydrate (2.00 g, 5.80 mmol, 1 eq.) and pyridine (1.82 g, 23.0 mmol, 4 eq.) were dissolved in degassed water (18 ml). To this solution sodium cyanoborohydride (0.72 g, 11.5 mmol, 2 equiv.) was added in portions. The resulting yellow suspension was stirred for one hour. The yellow solid was filtered and dried in vacuo to yield (3.288 g, 7.179 mmol Yield: 61 %) as yellow powder in moderate yields. FT-IR:  $\tilde{\nu}$  (cm<sup>-1</sup>) = 2341, 2184, 1599, 1440, 1216, 1120, 1068, 1038, 1008, 753, 697, 626, 421. Elemental analysis calculated C, 53.17, H, 6.19, N, 16.91. Found 52.85, H, 6.00, N, 16.69.

### [Zn(Py)<sub>4</sub>(NCBH<sub>3</sub>)<sub>2</sub>]**·0.5H<sub>2</sub>O**

The precursor complex used for synthesis was prepared with slight modifications to the literature.<sup>8</sup> Zinc(II) sulfate hydrate (2.00 g, 11.14 mmol, 1 equiv.), pyridine (3.52 g, 3.59 ml, 44.56 mmol, 4 equiv.) and sodium cyanoborohydride (1.40 g, 22.28 mmol, 2 equiv.) were suspended in water (50 ml). The reaction mixture was stirred for one hour, during which a colourless solid had formed. The solid was filtered and dried in vacuum to yield [Zn(py)<sub>4</sub>(NCBH<sub>3</sub>)<sub>2</sub>] as colourless powder (1.79 g, 3.87 mmol, 35 %). <sup>1</sup>H-NMR (400 MHz, DMSO,  $\delta$  (ppm)): 8.58 - 8.56 (m, 8H, pyCH), 7.82 - 7.78 (m, 4H, pyCH), 7.41 - 7.38 (m, 8H, pyCH), 0.56 - 0.10 (m, 6H, BH<sub>3</sub>) FT-IR:  $\tilde{\nu}$  (cm<sup>-1</sup>) = 2980, 2341, 2184, 1598, 1575, 1558, 1541, 1520, 1507, 1487, 1457, 1440, 1397, 1216, 1153, 1120, 1068, 1038, 1008, 860, 765, 753, 697, 626, 420. Elemental analysis calculated C, 56.16, H, 5.78, N, 17.86. Found C, 55.82, H, 5.69, N, 17.66.

## 8. References:

1. D. F. Evans, *J. Chem. Soc.*, 1959, 2003-2005.
2. C. Piguet, *J. Chem. Ed.*, 1997, **74**, 815-816.
3. O. Kahn, *Molecular Magnetism*, VCH Publishers Inc., New York, 1993.
4. C. P. Slichter and H. G. Drickamer, *J. Chem. Phys.*, 1972, **56**, 2142-2160.
5. H. Toftlund and J. J. McGarvey, *Top. Curr. Chem.*, 2004, **233**, 151-166.

6. L. J. Kershaw Cook, R. Kulmaczewski, R. Mohammed, S. Dudley, S. A. Barrett, M. A. Little, R. J. Deeth and M. A. Halcrow, *Angew. Chem. Int. Ed.*, 2016, **55**, 4327-4331
7. L. A. Yatsunyk and F. A. Walker, *Inorg. Chem.*, 2004, **43**, 757-77.
8. K. Nakano, N Suemura, S Kawata, A Fuyuhiko, T Yagi, S Nasu, S Morimoto and S Kaizaki, *Dalton Trans.*, 2004, 982-988.
